# Supplementary material
Source: Royal Society of Chemistry journal article supplement (doi:10.1039/d6im00053c)
Supplement: d6im00053c1.pdf [file d6im00053c1.pdf]

## Supporting Information

-for-

**Levitation-guided disorder engineering unlocks efficient nitrite-to-ammonia electroconversion**

Juhyeon Park,<sup>†a</sup> Jayesh Cherusseri,<sup>†a</sup> Jayaraman Theerthagiri,<sup>†a</sup> Ahreum Min<sup>†a</sup> Anuj Kumar,<sup>†b</sup>  
Gyeong-Ah Kim,<sup>c</sup> Nivarthi Rajiv Bharadwaj,<sup>a</sup> Sanggyeong Lee,<sup>a</sup> Rimal Isaac R.S<sup>d</sup> and Myong  
Yong Choi\*<sup>ac</sup>

<sup>a</sup> Department of Chemistry (BK21 FOUR), Research Institute of Advanced Chemistry,  
Gyeongsang National University, Jinju 52828, Republic of Korea

<sup>b</sup> Nano-Technology Research Laboratory, Department of Chemistry, GLA University, Mathura,  
Uttar Pradesh 281406, India

<sup>c</sup> Core-Facility Center for Photochemistry & Nanomaterials, Gyeongsang National University,  
Jinju 52828, Republic of Korea

<sup>d</sup> Department of Nanotechnology, Noorul Islam Centre for Higher Education, Kumaracoil,  
Thuckalay, Kanyakumari, Tamil Nadu 629180, India

\* Corresponding author E-mail: [mychoi@gnu.ac.kr](mailto:mychoi@gnu.ac.kr) (M. Y. Choi)

† These authors contributed equally to this work

## **Method S1. Material Characterizations**

The crystal structures of the materials were characterized by X-ray diffraction (XRD, Bruker D8 Advance A25, Germany) using Cu-K $\alpha$  radiation ( $\lambda = 1.542 \text{ \AA}$ ). Raman spectroscopy was performed using a DXR 2xi Raman microscope (Thermo Fisher Scientific, USA) equipped with a continuous-wave laser operating at a wavelength of 532 nm. The microstructure and surface morphology were examined using field-emission scanning electron microscopy (FESEM, TESCAN S8000, Czech Republic). Elemental composition and spatial distribution were analyzed via energy-dispersive X-ray spectroscopy (EDS, Ultim Max, Oxford Instruments), integrated with the FESEM system. High-resolution transmission electron microscopy (HRTEM, FEI Tecnai TF30ST, USA) was conducted at an accelerating voltage of 300 kV to observe the ultrafine structural features. Fourier transform infrared (FTIR) spectroscopy (Nicolet iS10, Thermo Fisher Scientific, USA) was employed to investigate the chemical bonding. Surface chemical states were further analyzed using X-ray photoelectron spectroscopy (XPS, NEXSA G2, Thermo Fisher Scientific, USA) with monochromatic Al-K $\alpha$  radiation.

## **Method S2. Preparation of Catalyst Electrodes**

Catalyst electrodes for electrochemical measurements were prepared by depositing the catalyst material onto a carbon cloth substrate. In a typical procedure, a homogeneous catalyst ink was prepared by sonicating a slurry containing 1 mg of catalyst, 95  $\mu\text{L}$  of deionized water, 95  $\mu\text{L}$  of ethanol, and 10  $\mu\text{L}$  of Nafion solution (5 wt%) for 30 min. The resulting ink was then drop-cast onto a pre-cleaned carbon cloth substrate with a geometric area of 1 cm  $\times$  1 cm and subsequently dried at 60  $^{\circ}\text{C}$  for 3 h.

### Method S3. Electrochemical Measurements

All electrochemical measurements for eNO<sub>2</sub>RR were conducted using a CHI 708E electrochemical workstation (CH Instruments, USA) in a two-compartment H-type cell. The working electrode consisted of the catalyst coated onto carbon cloth (CC) via a slurry-casting method. A platinum wire and a Hg/HgO electrode were used as the counter and reference electrodes, respectively. The catholyte consisted of 0.1 M KNO<sub>2</sub> in 1 M KOH, while 1 M KOH was used as the anolyte. The anodic and cathodic compartments were separated by a pretreated Nafion-117 membrane. The membrane was sequentially soaked in 3% H<sub>2</sub>O<sub>2</sub> for 1 h, deionized water for 2 h, and 0.5 M H<sub>2</sub>SO<sub>4</sub> for 1 h at 80°C, followed by repeated washing with deionized water. For electrode preparation, a homogeneous slurry was prepared by sonicating 1 mg of catalyst in a mixture of 95 μL of deionized water, 95 μL of ethanol, and 10 μL of 5 wt% Nafion binder for 30 min. The slurry was then drop-cast onto a pretreated CC (geometric area = 1 cm<sup>2</sup>) and dried at 60°C for 3 h. All potentials measured with respect to the Hg/HgO reference electrode were converted to the reversible hydrogen electrode (RHE) scale using the Nernst equation (1):

$$E_{\text{RHE}} = E_{\text{Hg/HgO}} + E_{\text{Hg/HgO}}^0 + 0.059 \text{ V} \times \text{pH} \quad (1)$$

where  $E_{\text{Hg/HgO}}$  is the measured potential from the Hg/HgO electrode,  $E_{\text{Hg/HgO}}^0$  is the standard electrode potential (0.098 V), and pH is the electrolyte pH.

Tafel slopes were calculated from the polarization curves by plotting the overpotential ( $\eta$ ) versus the logarithm of the current density ( $j$ ). The Tafel slope was determined using the following equation (2):

$$\eta = a + (b \times \log(j)) \quad (2)$$

where  $b$  represents the Tafel slope, and  $a$  denotes the Tafel constant.

Electrochemical impedance spectroscopy (EIS) analysis was performed at a fixed potential

(V vs. RHE) within a frequency range of 0.1 - 10<sup>5</sup> Hz. The turnover frequency (TOF) of the electrocatalysts was calculated using the following equation (3):

$$\text{TOF (s}^{-1}\text{)} = \frac{j \times N_A}{n \times F \times S_a}$$

(3)

Where,  $N_A$  is the Avogadro's number,  $n$  is the number of electrons involved during the reaction,  $F$  is the Faraday constant (96,485.3 C mol<sup>-1</sup>), and  $S_a$  is the number of available active sites. The active sites ( $S_a$ ) can be determined using the following equation (4):

$$S_a = \frac{(\int \text{Area under the reduction curve} / \text{Scan rate})}{\text{Charge of the electron}}$$

(4)

The electrochemical double-layer capacitance ( $C_{dl}$ ) was estimated from cyclic voltammetry (CV) measurements by plotting the average current density difference ( $\Delta j/2 = (j_a - j_c)/2$ ) versus the scan rate. The slope of the resulting linear plot represents the electrochemical  $C_{dl}$  of the material, which was calculated using the equation (5):

$$C_{dl} = \frac{d(\Delta j)}{2dv}$$

(5)

Where,  $v$  represents the scan rate.

#### Method S4. Quantification of NH<sub>4</sub><sup>+</sup> Product

The yield of NH<sub>4</sub><sup>+</sup> produced after eNO<sub>2</sub>RR electrolysis for 1 was quantified using the colorimetric indophenol blue method. After NO<sub>2</sub><sup>-</sup> electroreduction, 50 μL of catholyte was extracted from the electrolytic cell and mixed with 2 mL of 1 M NaOH solution containing 5 wt.% sodium citrate dihydrate and 5 wt.% salicylic acid. Subsequently, 1 mL of NaClO (0.05 M) and

0.2 mL of sodium nitroferricyanide (0.1 wt.%) were added to the mixture, which was then allowed to stand in the dark for 2 h. Following this, UV-visible spectra (Thermo Fisher Scientific, USA) Thermo Scientific were recorded at ~655 nm, and  $\text{NH}_4^+$  concentrations were quantified using a calibration curve based on  $\text{NH}_4\text{Cl}$  standards (5, 10, 50, 100, 200, and 400 ppm). The  $\text{NH}_4^+$  quantification was further confirmed via  $^1\text{H}$  nuclear magnetic resonance spectroscopy (300 MHz, Bruker Avance-III, Germany). After 1 h of  $\text{eNO}_2\text{RR}$ , 1 mL of catholyte was mixed with 0.5 mL of  $\text{D}_2\text{O}$  and adjusted to pH 2 with 0.5 M  $\text{H}_2\text{SO}_4$ . Spectra revealed three characteristic peaks for  $\text{NH}_4^+$ . The  $\text{NH}_4^+$  concentration was determined using a calibration curve prepared from  $\text{NH}_4\text{Cl}$  standards (100, 200, and 500 ppm).

#### Method S5. Calculation of $\text{NH}_4^+$ Yield Rate and Faradaic Efficiency

The  $\text{NH}_3$  yield rate during  $\text{eNO}_2\text{RR}$  was calculated using the following equation (6):

$$\text{Yield rate} = \frac{C_{(N-NH_4^+)} \times V_{catholyte}}{t \times m_{cat}} \quad (6)$$

Where,  $C_{(N-NH_4^+)}$  is the N concentration in the  $\text{NH}_4^+$  (ppm, equivalent to  $\text{mg}\cdot\text{L}^{-1}$ ),  $V_{catholyte}$  is the total volume of the electrolyte in the cathode compartment (20 mL),  $t$  is the duration of the bulk electrolysis test for  $\text{eNO}_2\text{RR}$  (in hours) and  $m_{cat}$  is the catalyst loading (which can alternatively be replaced by the area of electrode). Furthermore, the  $\text{NH}_3$  Faradaic efficiency for  $\text{NH}_4^+$  formation was calculated using the following equation (7):

$$\text{Faradaic efficiency} = \frac{nF \times C_{(N-NH_4^+)} \times V_{catholyte}}{M_{(NH_4^+)} \times Q} \quad (7)$$

Where,  $M_{(NH_4^+)}$  is the molar mass of  $NH_4^+$  ( $g \cdot mol^{-1}$ ),  $F$  is the Faradaic constant ( $96,485.3 C \cdot mol^{-1}$ ),  $Q$  is the total charge passed during the reaction (C);  $n$  is the number of electrons involved in  $eNO_2RR$  ( $n = 6$ ).

### **Method S6. Quantification of $N_2$ and $H_2$**

$N_2$  and  $H_2$  generated during  $eNO_2RR$  over CuCoPBA and CuCoPBA-S were quantified separately using gas chromatography (GC). He and  $N_2$  were employed as carrier gases for the analysis of  $N_2$  and  $H_2$ , respectively. The gases were quantified from calibration curves obtained by injecting known volumes (50, 100, 150, 200, and 250  $\mu L$ ) of the corresponding gases. Gas quantification was performed using a sealed H-type cell. Before each bulk electrolysis experiment, the cell was purged with He for 30 mins. After electrolysis, fixed volumes of the cathodic headspace gas were withdrawn using a gas-tight syringe and injected into the GC for analysis. Background measurements were conducted after He purging, before starting the bulk electrolysis experiment.

### **Method S7. Calculation of $H_2$ Yield Rate and Faradaic Efficiency**

The Faradaic efficiency of  $H_2$  was calculated using the equation:

$$Faradaic\ Efficiency = \frac{N \times n \times F}{Q} \quad (8)$$

Where,  $N$  denotes the number of moles of specific product,  $n$  is the number of electrons transferred per mole ( $n = 2$  for  $H_2$ ),  $F$  is the Faraday constant ( $96,485 \text{ C mol}^{-1}$ ), and  $Q$  represents the total charge passed during electrolysis.

### **Method S8. *In situ* Raman Spectroscopic Measurements**

*In situ* Raman spectroscopy was performed using an electrochemical flow cell (Redoxme AB, Sweden) configured with a three-electrode setup: a catalyst-coated CC as the working electrode, a platinum wire as the counter electrode, and a Hg/HgO reference electrode. The  $eNO_2RR$  measurements were conducted in 1 M KOH containing 0.1 M  $KNO_2$ . Raman spectra were recorded at various applied potentials using a DXR3 Raman microscope (Thermo Fisher Scientific, UK) equipped with a 532 nm Nd:YAG laser and a 50X objective lens. All electrochemical operations were controlled via a CHI 708E electrochemical workstation.

### **Method S9. Density Functional Theory (DFT) Calculations**

#### **(a) Structural Optimization:**

The optimization process for all structures was completed when the force on any atom was reduced to below  $10^{-4} \text{ Ry/Bohr}$ . To characterize the van der Waals (vdW) interactions in the CoCuPBA-S heterostructure, Grimme's semi-empirical DFT-D3 dispersion correction approach was applied. Convergence thresholds of  $0.03 \text{ eV/\AA}$  for atomic forces and  $10^{-5} \text{ Ry}$  for energy were used using structural optimizations. The Brillouin zone sampling was conducted using a k-point grid of  $8 \times 10 \times 6$  generated by the Monkhorst-Pack scheme, ensuring sufficient accuracy for total energy estimations. After convergence testing, a plane-wave cutoff of 250 Ry and a charge density cutoff of 460 Ry were selected.

Spin-polarized calculations were conducted to investigate the density of states. To understand the contributions of specific atomic orbitals to the electronic structure, the projected DOS was further analyzed. Charge density maps were produced to examine the electronic distribution within the material, highlighting how structural symmetry affects electronic properties. The charge density difference was calculated using the following formula:

$$\Delta\rho_{(Density\ Difference\ over\ CoCuPBA-S)} = \rho_{(CoCuPBA-S)} - \rho_{(CoCuPBA)} - \rho_{(Cu2S)} - \rho_{(Co9S8)} \quad (9)$$

### (b) Gibbs Free Energy Calculations:

The catalytic activity of these high-entropy materials was evaluated by computing the Gibbs free energy ( $\Delta G$ ) for the  $\text{NO}_2$  reduction process based on adsorption energies. The adsorption energies for important intermediates were determined using the equation:

$$E_{\text{ads}} = E_{\text{slab+adsorbate}} - E_{\text{slab}} - E_{\text{adsorbate}} \quad (10)$$

where  $E_{\text{slab+adsorbate}}$  represents the total energy of the adsorbed system,  $E_{\text{slab}}$  is the energy of the clean surface, and  $E_{\text{adsorbate}}$  is the energy of the gas-phase adsorbate. The Gibbs energy change was calculated using the following equation:

$$\Delta G = \Delta E_{\text{ads}} + \Delta ZPE - T\Delta S + eU \quad (11)$$

Here, the symbols  $\Delta E$ ,  $\Delta ZPE$ ,  $T\Delta S$ , and  $U$  denote the following terms:  $\Delta E$  represents the variation in electronic energy;  $\Delta ZPE$  denotes the difference between zero-point energy and the applied electrode potential;  $T\Delta S$  pertains to the entropy at 273.15 K; and  $U$  symbolizes potential energy.

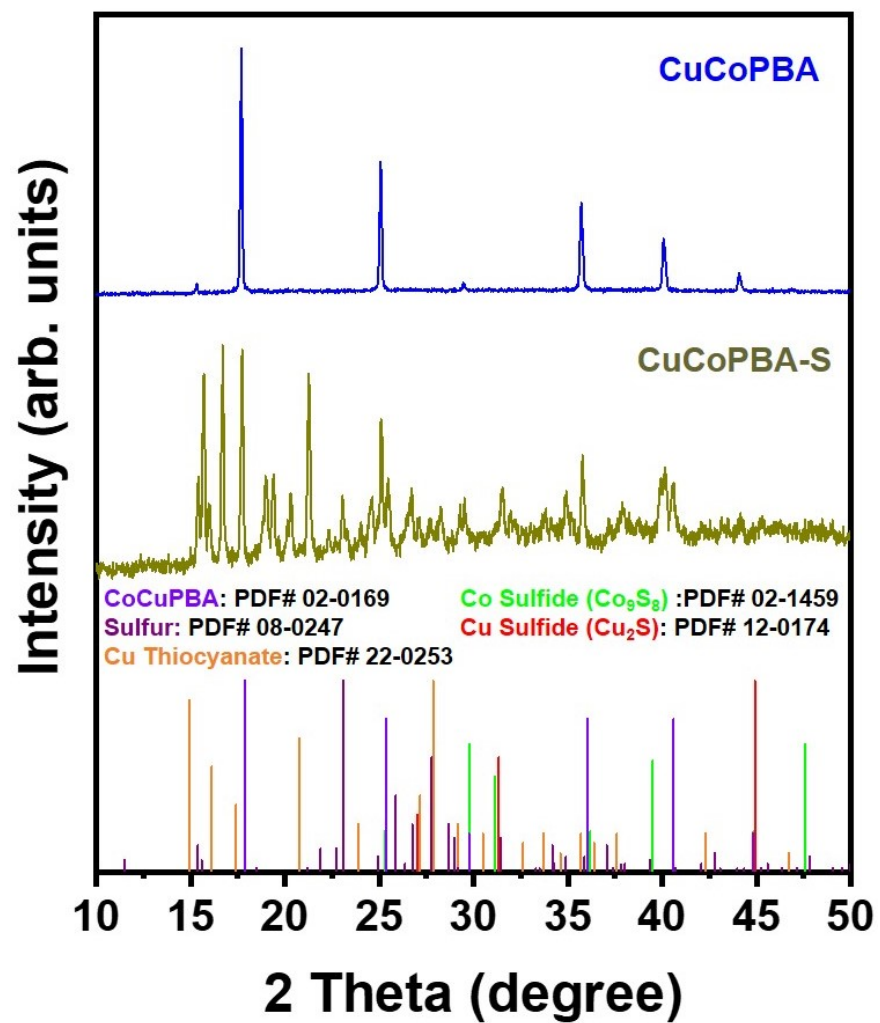

Fig. S1. XRD spectra of CoCuPBA and CoCuPBA-S.

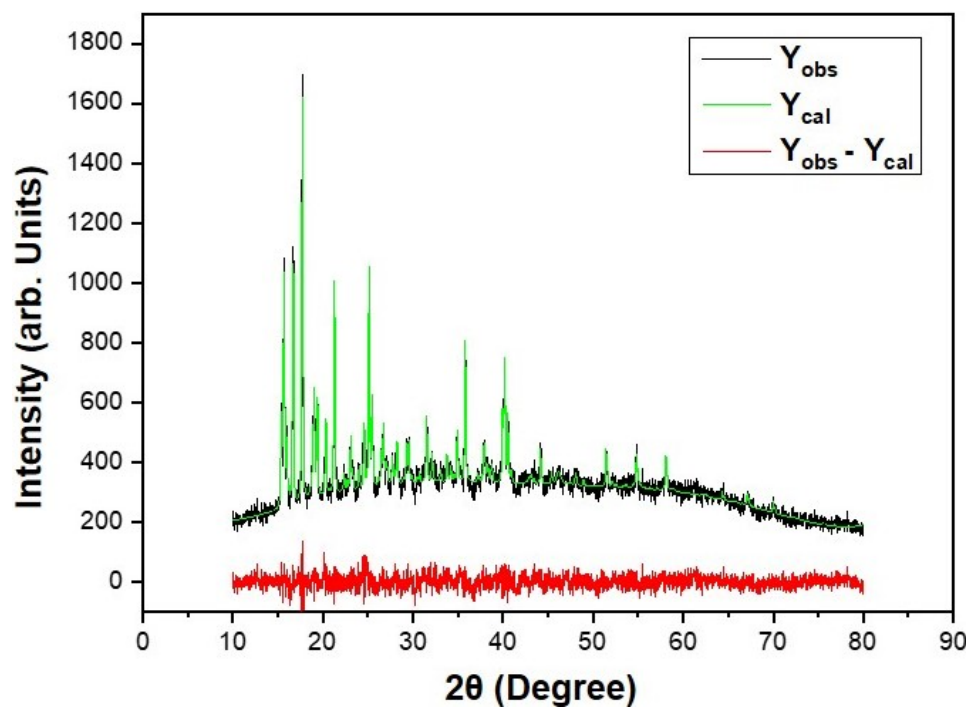

**Fig. S2.** XRD Rietveld analysis of CoCuPBA-S.

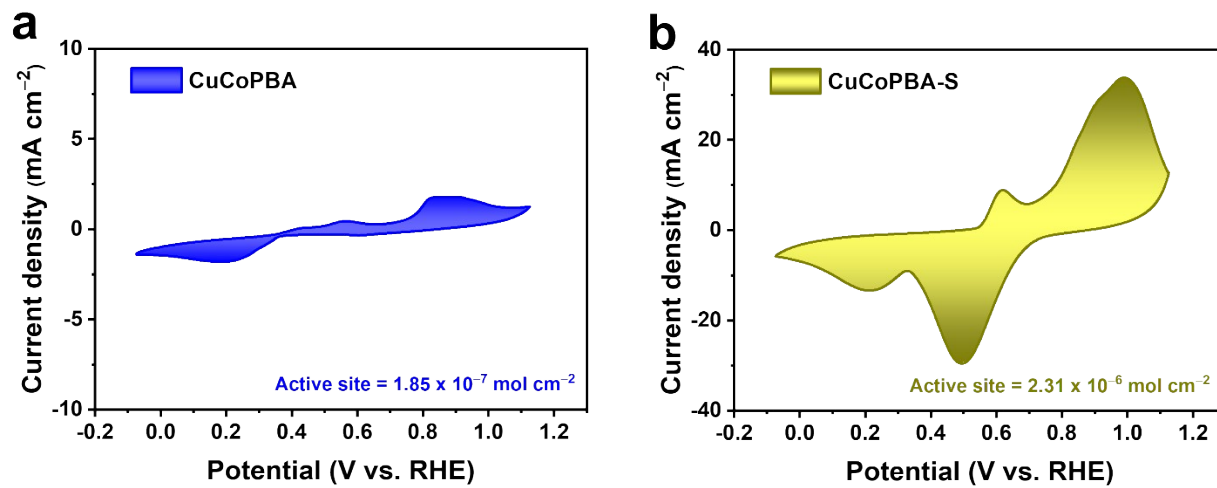

**Fig. S3.** CV curves of (a) CuCoPBA and (b) CuCoPBA-S electrocatalysts during the eNO<sub>2</sub>RR within a potential range of -0.1 to 1.1 V vs. RHE at 50 mV s<sup>-1</sup> in 1 M KOH electrolyte.

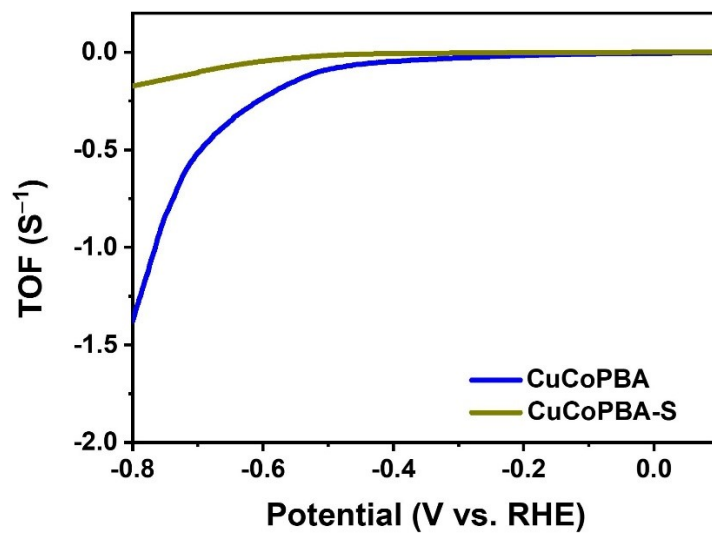

**Fig. S4.** TOF calculated for the CuCoPBA and CuCoPBA-S within a potential range of 0.0 to  $-0.8$  V vs. RHE at  $50 \text{ mV s}^{-1}$  in 1 M KOH electrolyte.

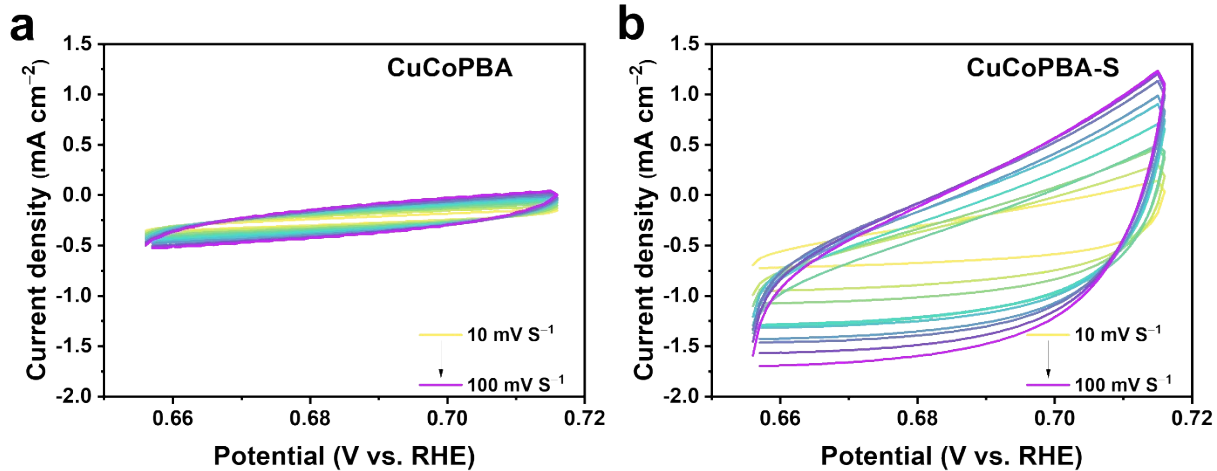

**Fig. S5.** CV curves of the (a) CuCoPBA and (b) CuCoPBA-S catalysts measured in the non-Faradaic potential region at various scan rates in 1 M KOH electrolyte to calculate the C<sub>dl</sub>.

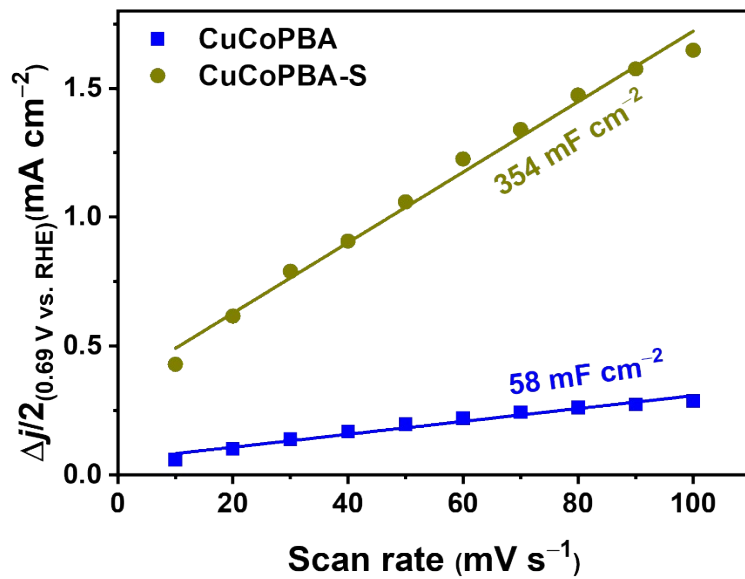

**Fig. S6.** The plots of  $\Delta j/2$  at 0.45 V vs. RHE versus the scan rates for CuCoPBA and CuCoPBA-S catalysts with their  $C_{dl}$  values.

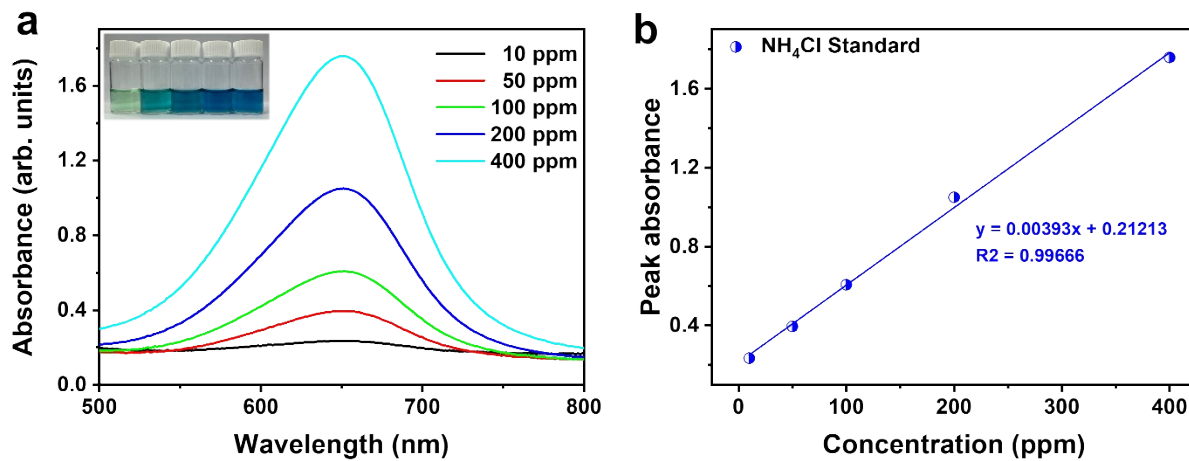

**Fig. S7.** (a) UV-visible absorption spectra for the  $\text{NH}_4\text{Cl}$  standard at different ppm and (b) the corresponding calibration curve.

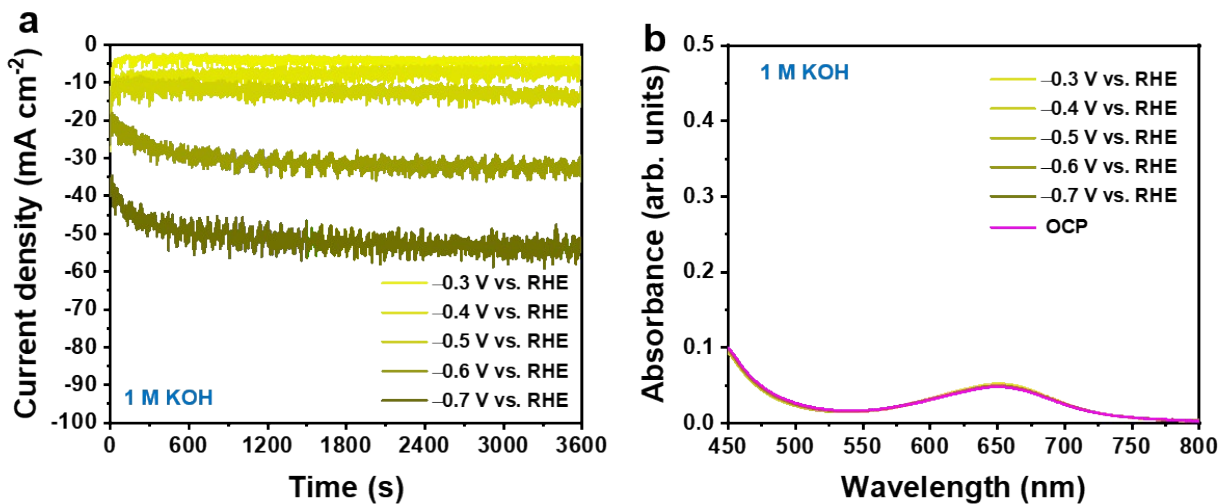

**Fig. S8.** (a) Variation in the current density profiles and (b) UV-Vis absorption spectra obtained during the electrolysis conducted in 1 M KOH aqueous solution at different reduction potentials.

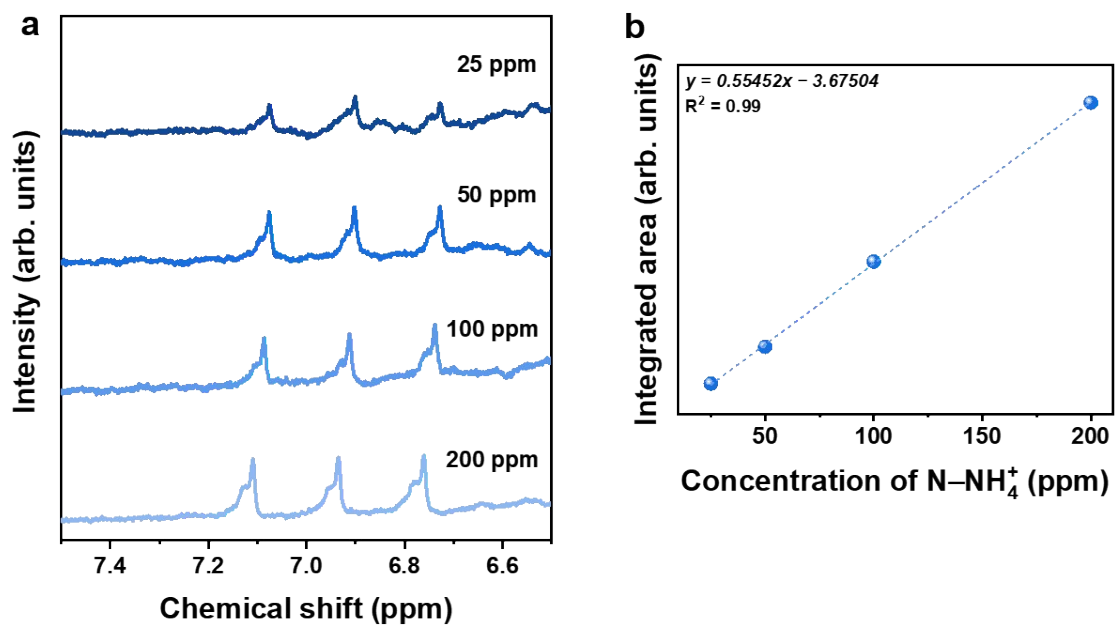

**Fig. S9.** (a)  $^1\text{H}$  NMR spectra and (b) calibration graph used for the quantification of  $\text{NH}_3$ .

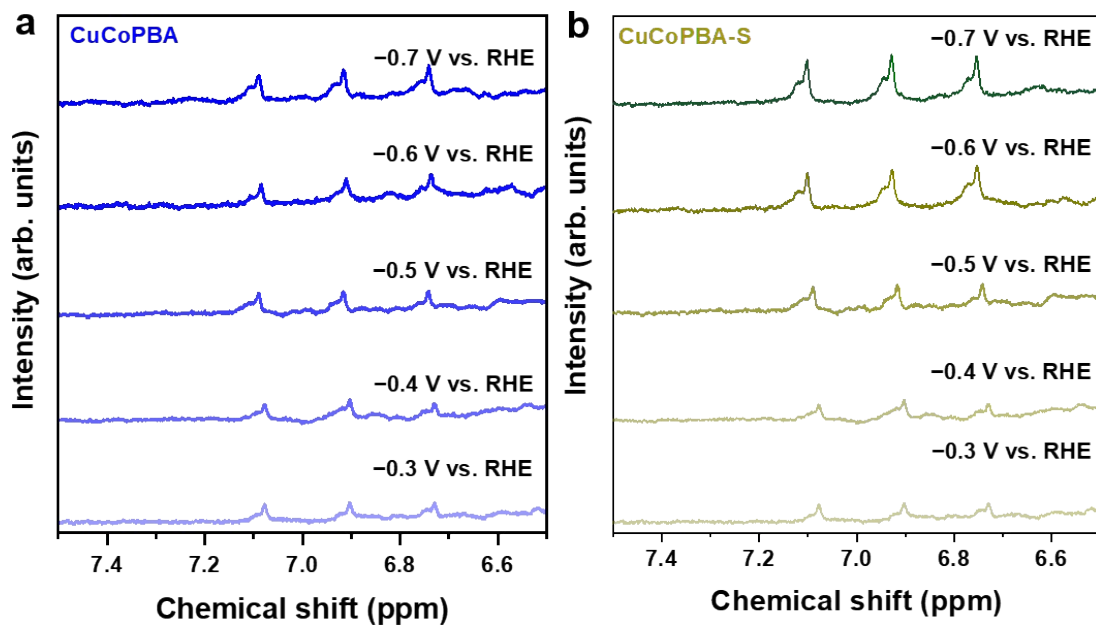

**Fig. S10.**  $^1\text{H}$  NMR spectra obtained for the (a) CuCoPBA and (b) CuCoPBA-S at different reduction potentials for the quantification of  $\text{NH}_3$ .

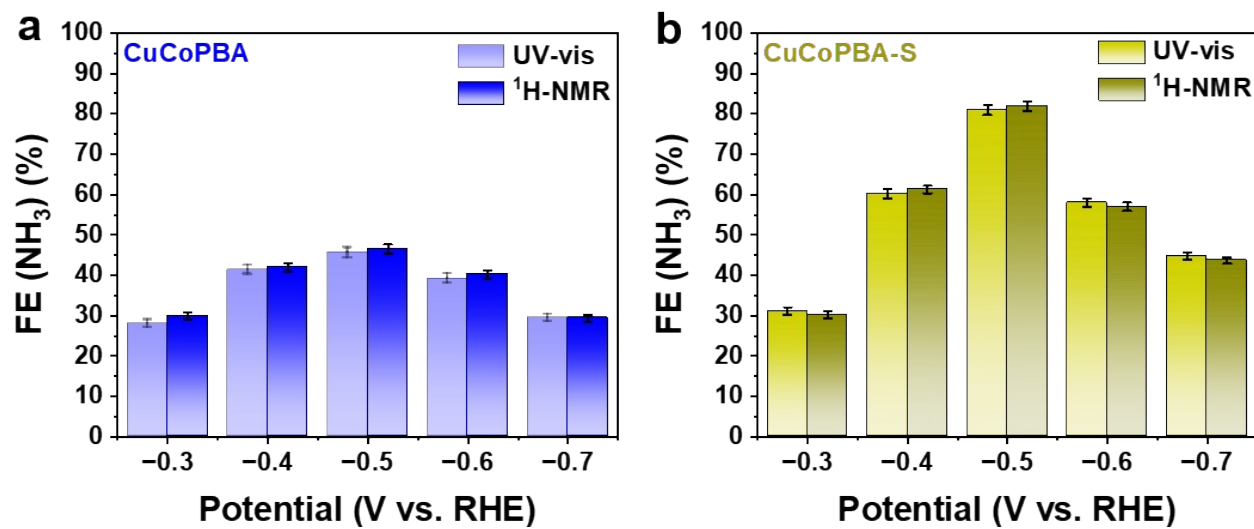

**Fig. S11.** Comparison of the FE (NH<sub>3</sub>) calculated from the UV-Vis spectra and <sup>1</sup>H NMR spectra for the (a) CuCoPBA and (b) CuCoPBA-S at different reduction potentials.

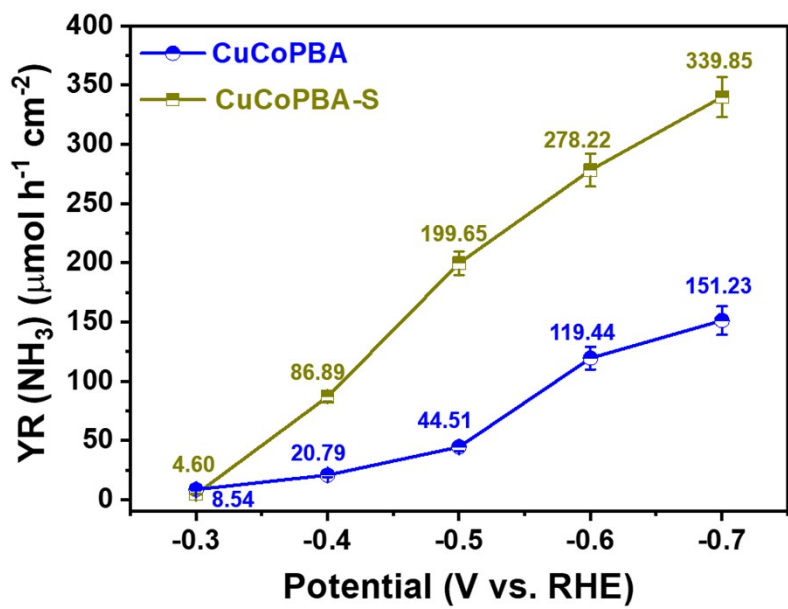

**Fig. S12.** YR (NH<sub>3</sub>) calculated from the UV-vis spectra for the CuCoPBA and CuCoPBA-S at different reduction potentials expressed in units of μmol h<sup>-1</sup> cm<sup>-2</sup>.

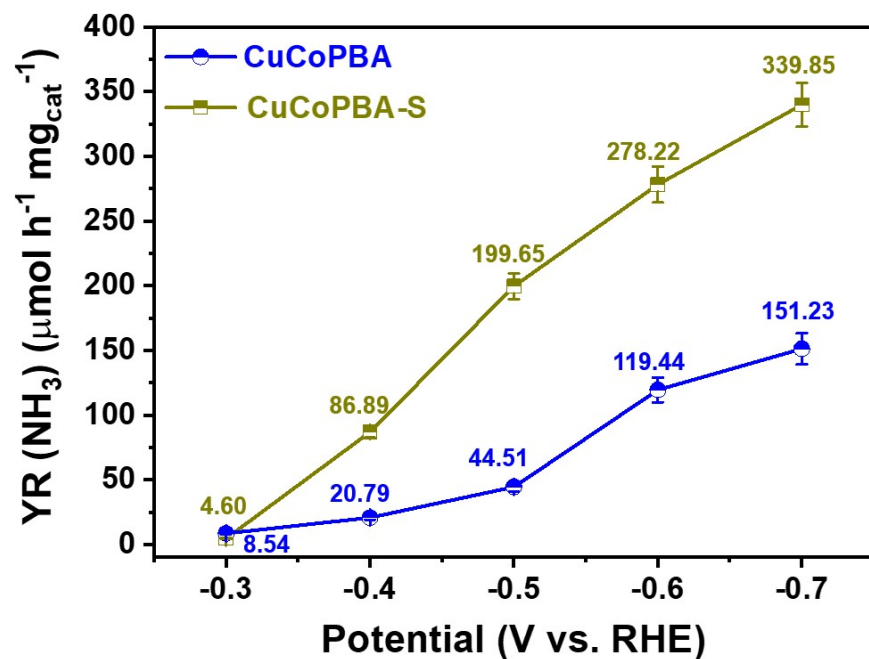

**Fig. S13.** YR (NH<sub>3</sub>) calculated from the UV-vis spectra for the CuCoPBA and CuCoPBA-S at different reduction potentials expressed in units of  $\mu\text{mol h}^{-1} \text{mg}_{\text{cat}}^{-1}$ .

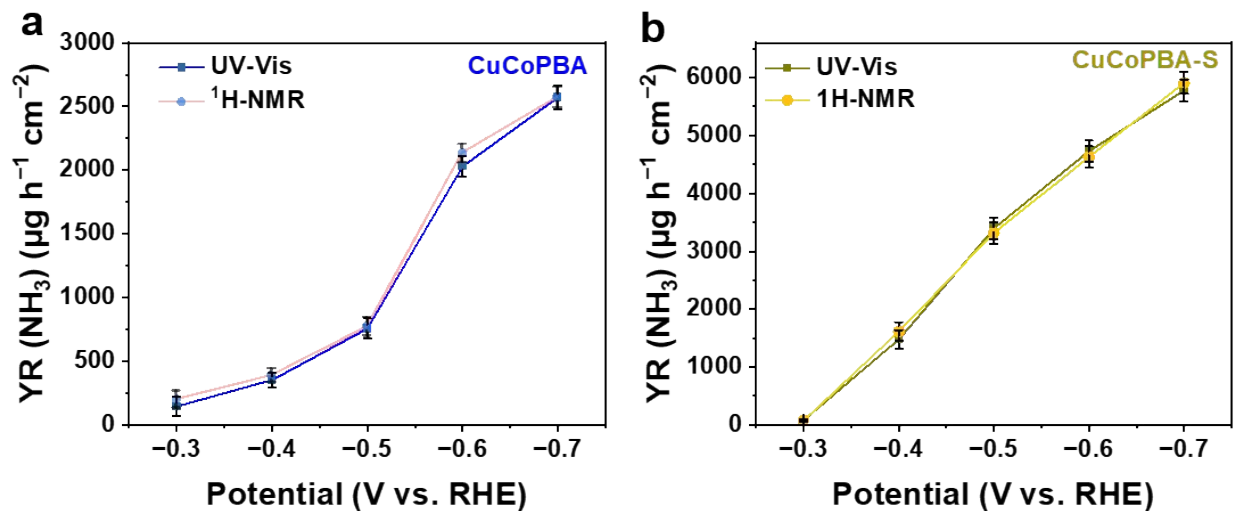

**Fig. S14.** Comparison of the YR (NH<sub>3</sub>) in μg h<sup>-1</sup> cm<sup>-2</sup> calculated from the UV-vis spectra and <sup>1</sup>H NMR spectra for the (a) CuCoPBA and (b) CuCoPBA-S at different reduction potentials.

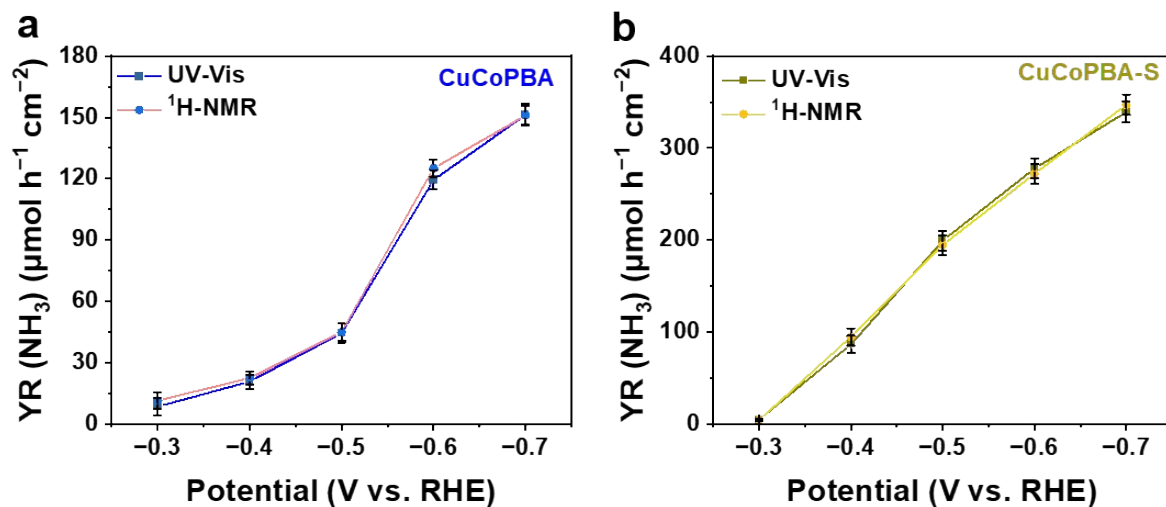

**Fig. S15.** Comparison of the YR (NH<sub>3</sub>) in μmol h<sup>-1</sup> cm<sup>-2</sup> calculated from the UV-vis spectra and <sup>1</sup>H NMR spectra for the (a) CuCoPBA and (b) CuCoPBA-S at different reduction potentials.

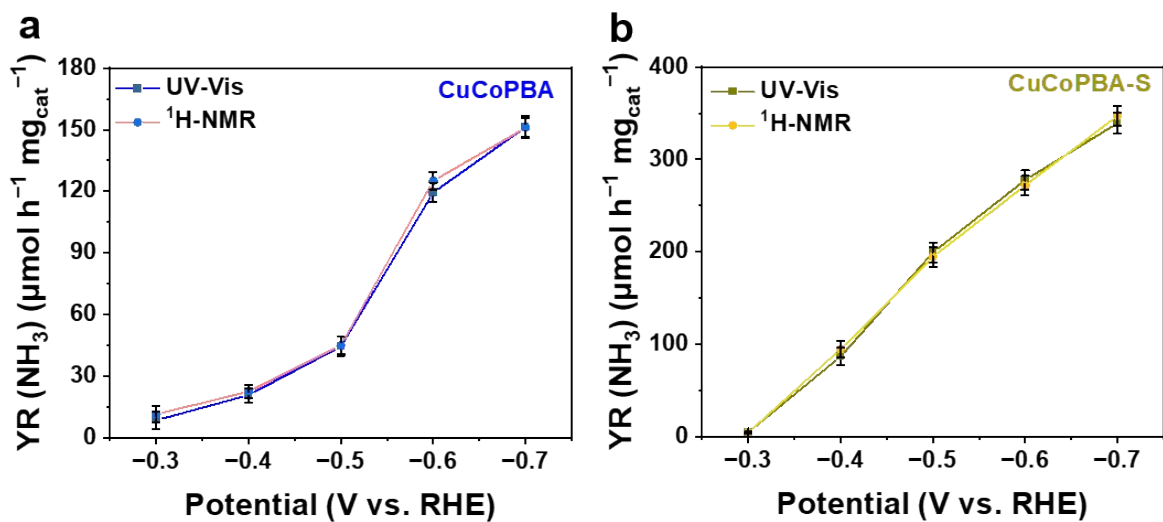

**Fig. S16.** Comparison of the YR (NH<sub>3</sub>) in  $\mu\text{mol h}^{-1} \text{mg}_{\text{cat}}^{-1}$  calculated from the UV-vis spectra and <sup>1</sup>H NMR spectra for the (a) CuCoPBA and (b) CuCoPBA-S at different reduction potentials.

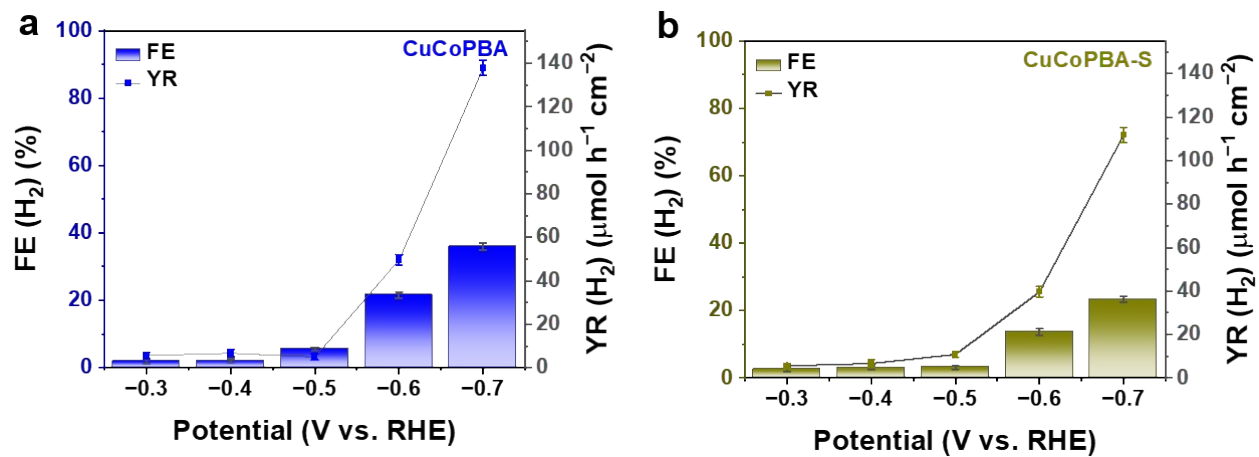

**Fig. S17.** Comparison of the FE (H<sub>2</sub>) and YR (H<sub>2</sub>) in μmol h<sup>-1</sup> cm<sup>-2</sup> calculated for the (a) CuCoPBA and (b) CuCoPBA-S at different reduction potentials.

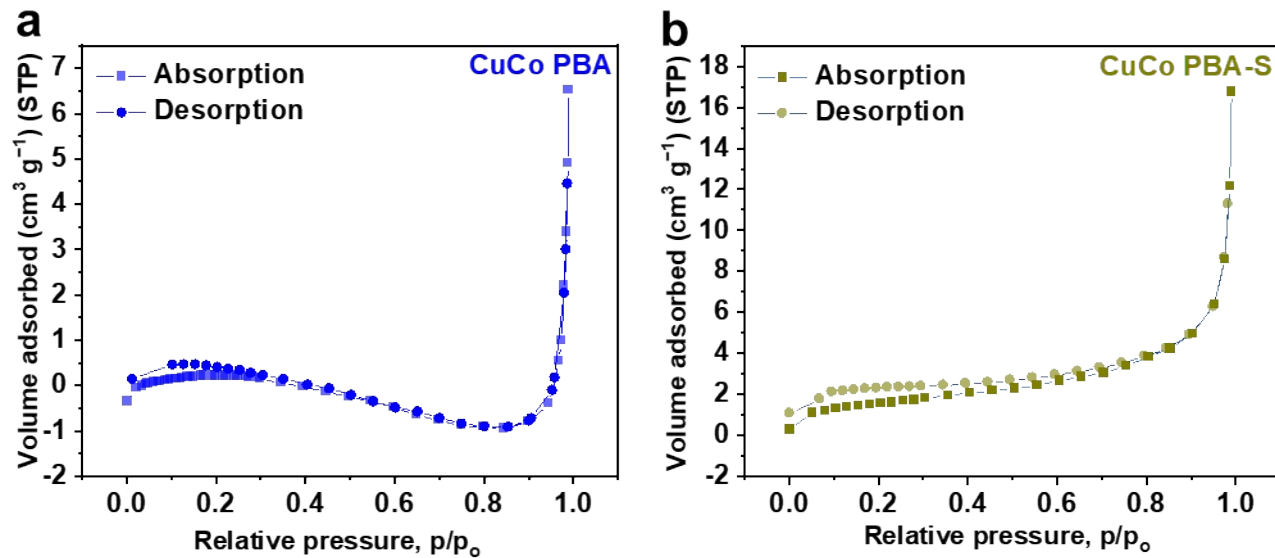

Fig. S18.  $\text{N}_2$ -sorption isotherms of (a) CuCoPBA and (b) CuCoPBA-S.

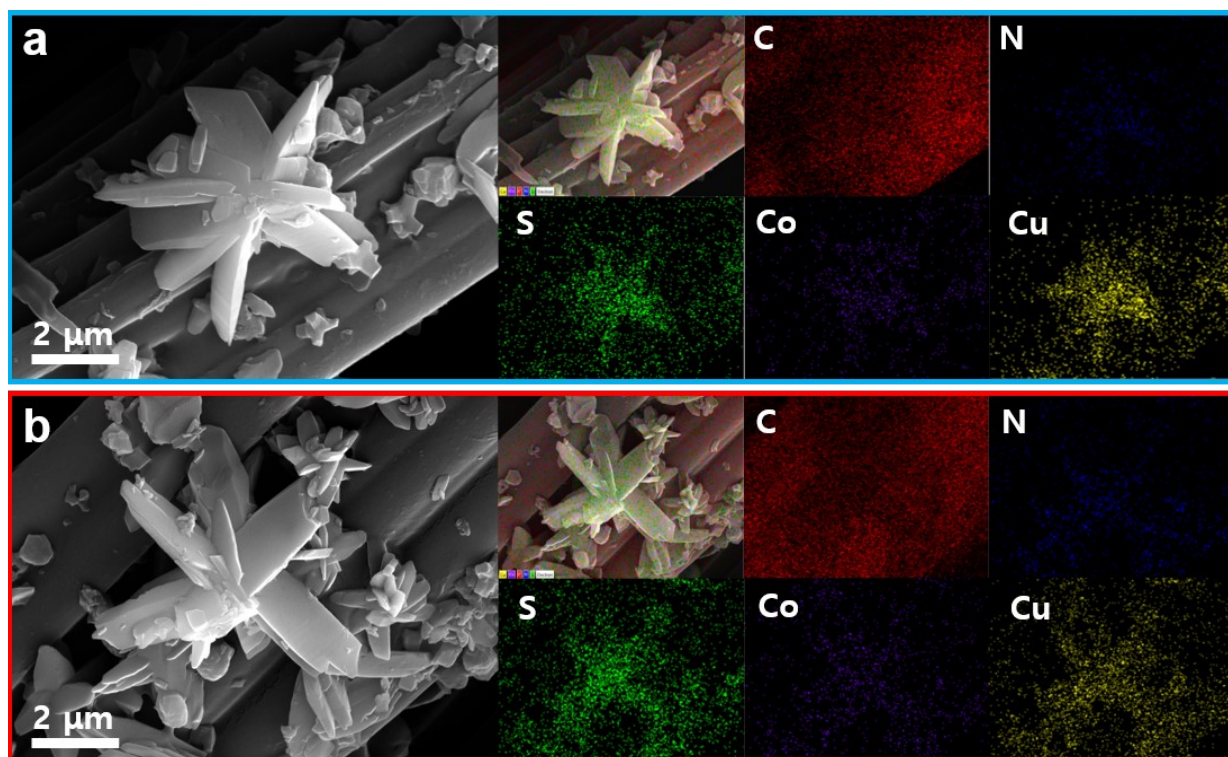

**Fig. S19.** FESEM images and SEM-EDS elemental mapping images for CuCoPBA-S catalyst electrode (a) before and (b) after the 10-hour stability test.

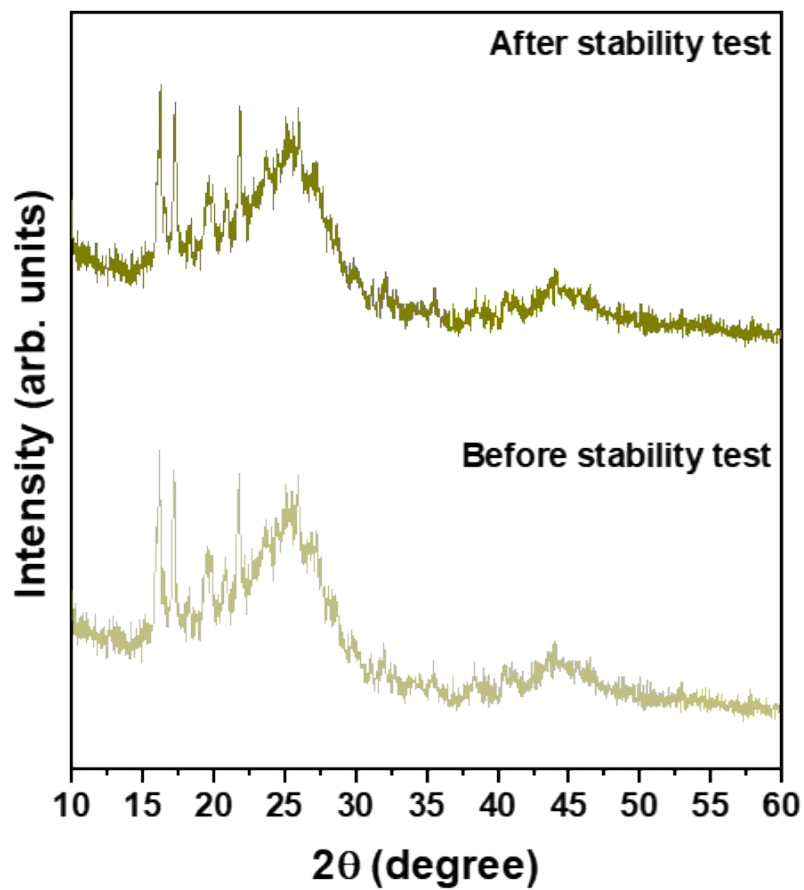

**Fig. S20.** XRD spectra of CuCoPBA-S catalyst electrode before and after the 10-hour stability test.

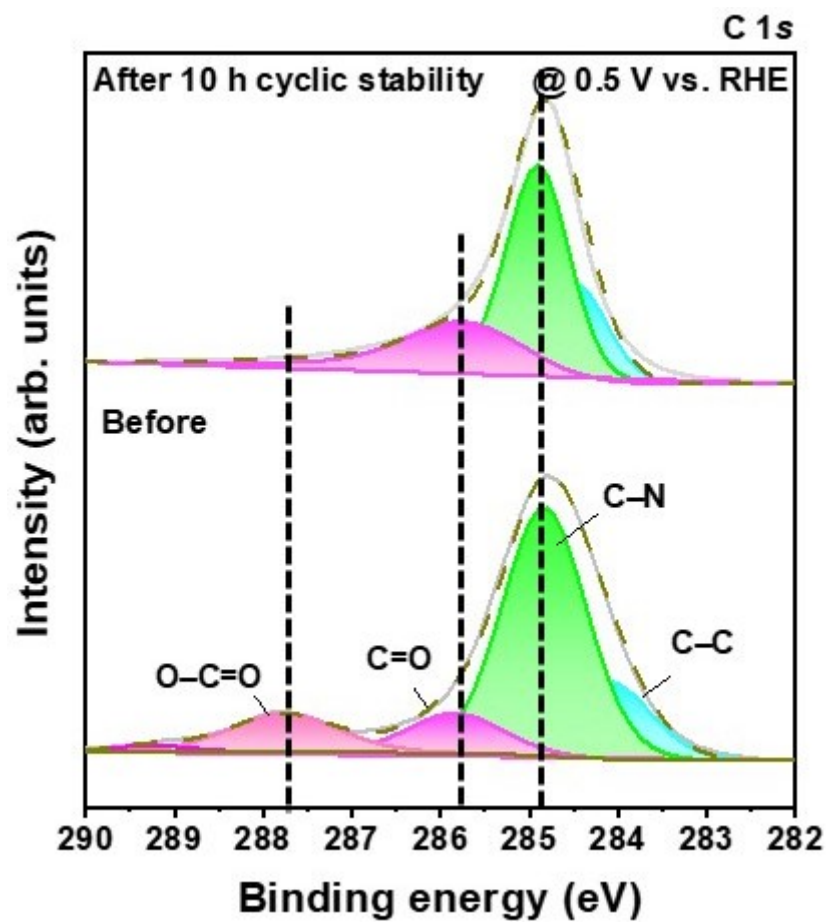

**Fig. S21.** XPS deconvoluted C 1s spectra of CuCoPBA-S catalyst electrode before and after the 10-hour stability test.

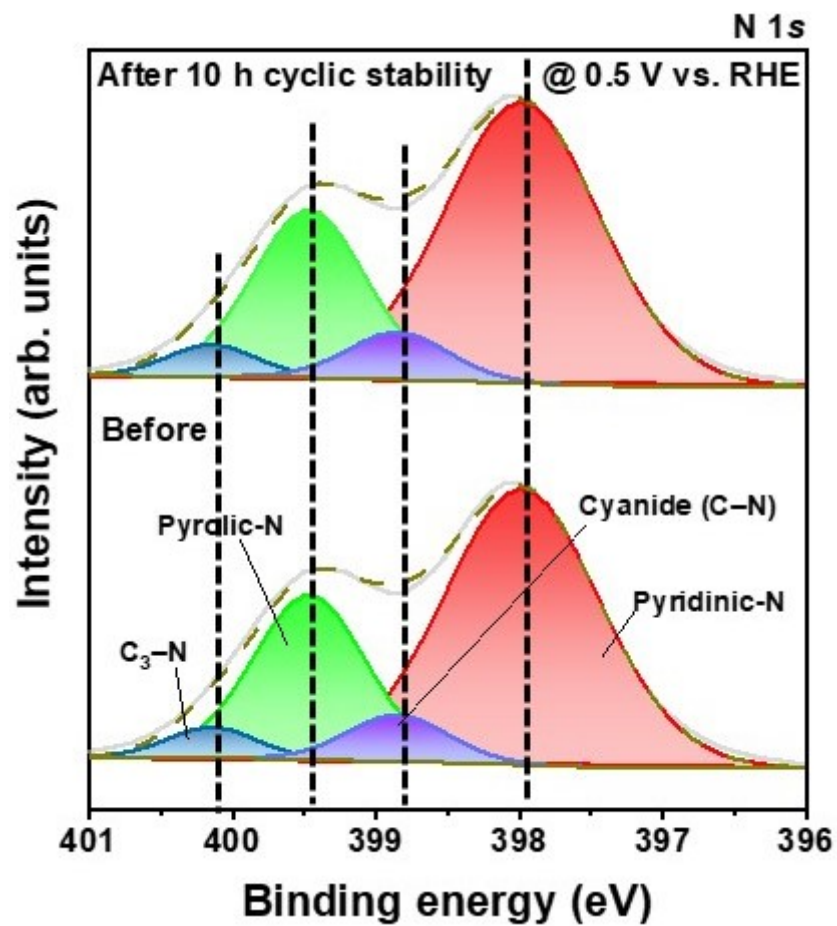

**Fig. S22.** XPS deconvoluted N 1s spectra of CuCoPBA-S catalyst electrode before and after the 10-hour stability test.

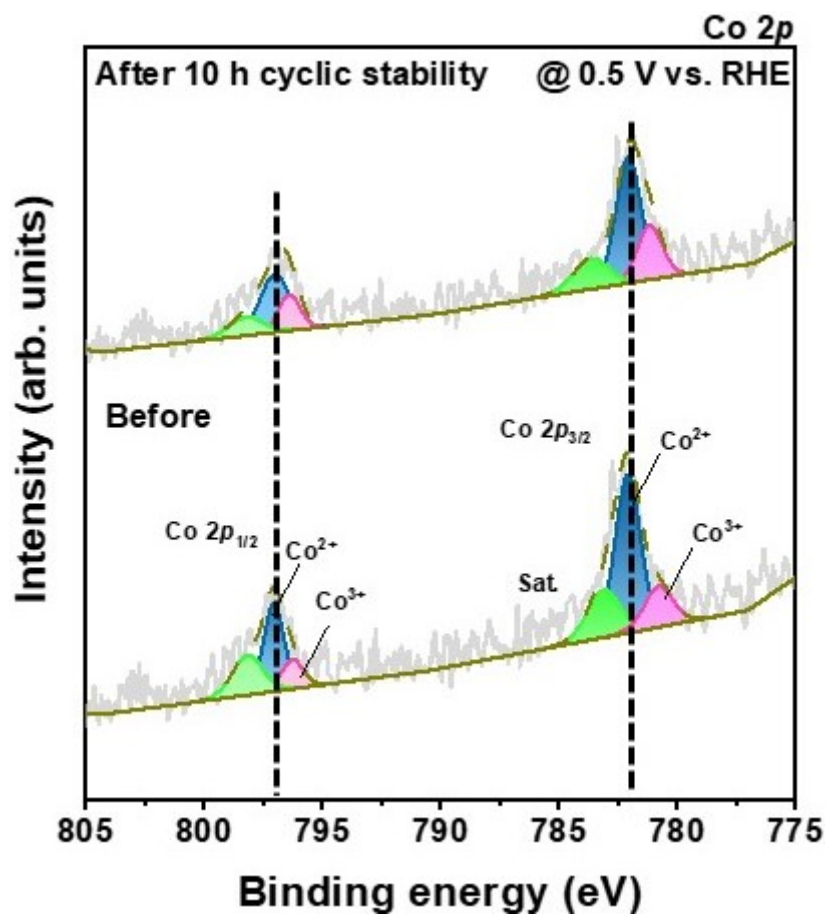

**Fig. S23.** XPS deconvoluted Co 2p spectra of CuCoPBA-S catalyst electrode before and after the 10-hour stability test.

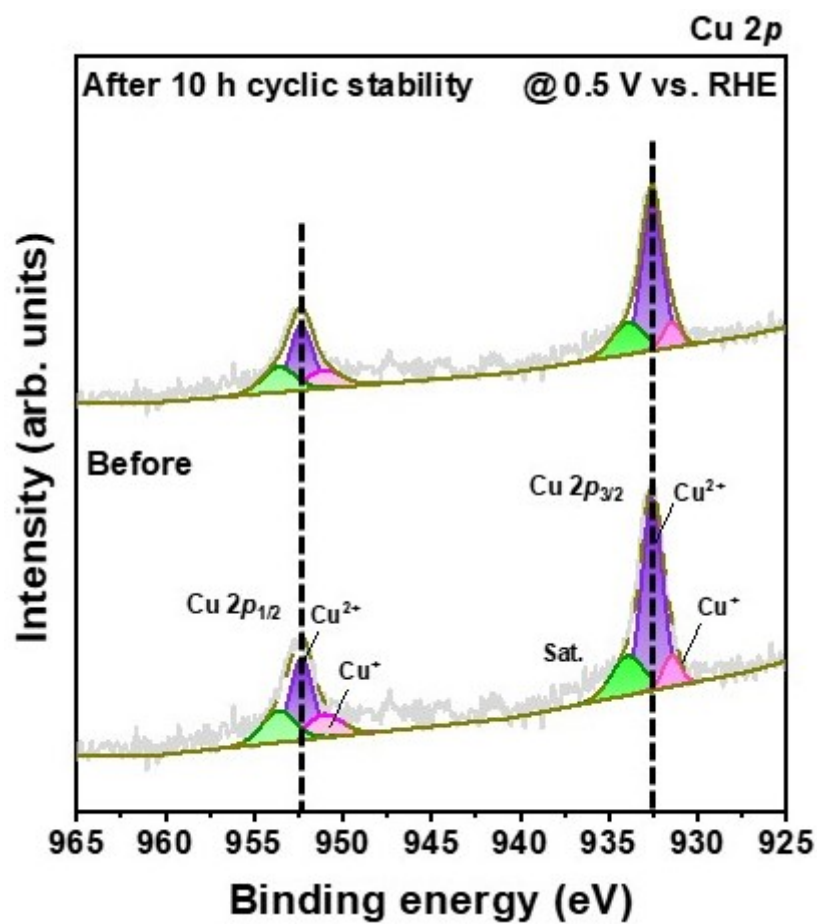

**Fig. S24.** XPS deconvoluted Cu 2p spectra of CuCoPBA-S catalyst electrode before and after the 10-hour stability test.

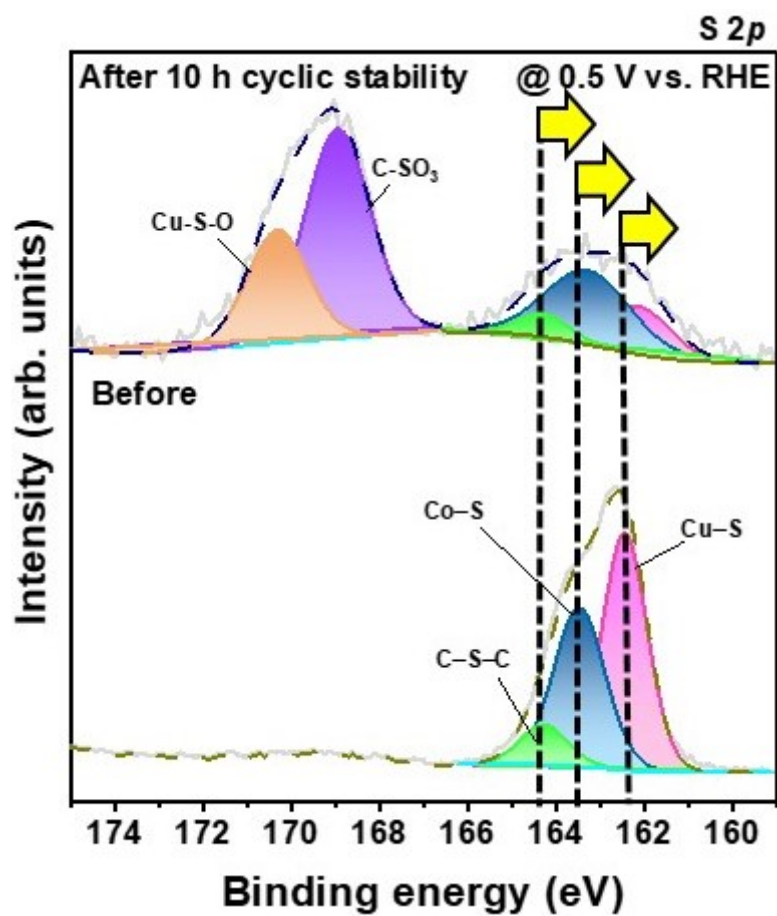

**Fig. S25.** XPS deconvoluted S 2p spectra of CuCoPBA-S catalyst electrode before and after the 10-hour stability test.

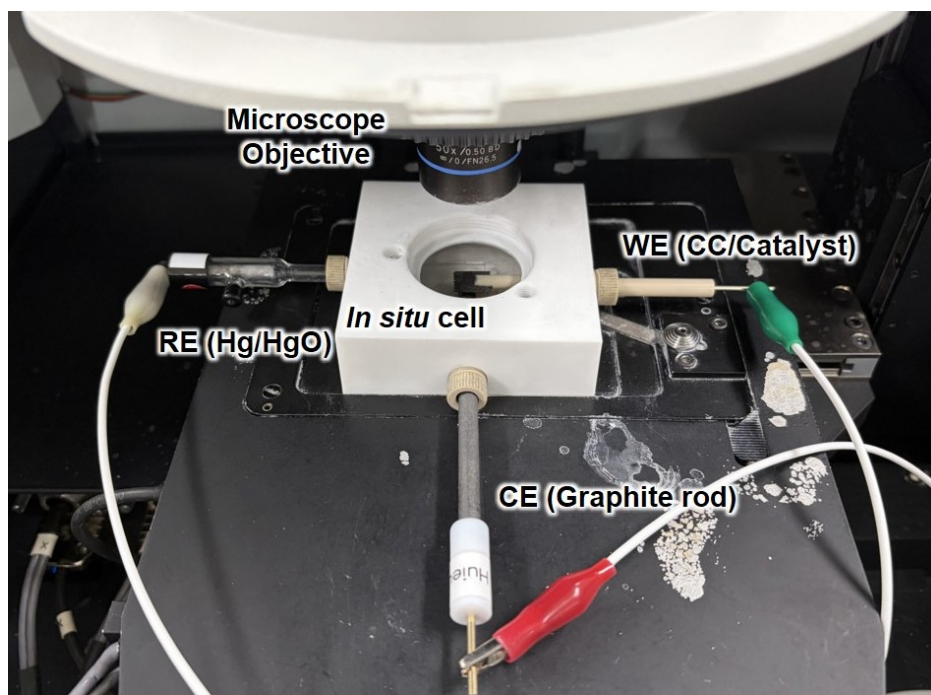

**Fig. S26.** Digital image of the experimental setup used for the *in situ* Raman spectroscopy measurement.

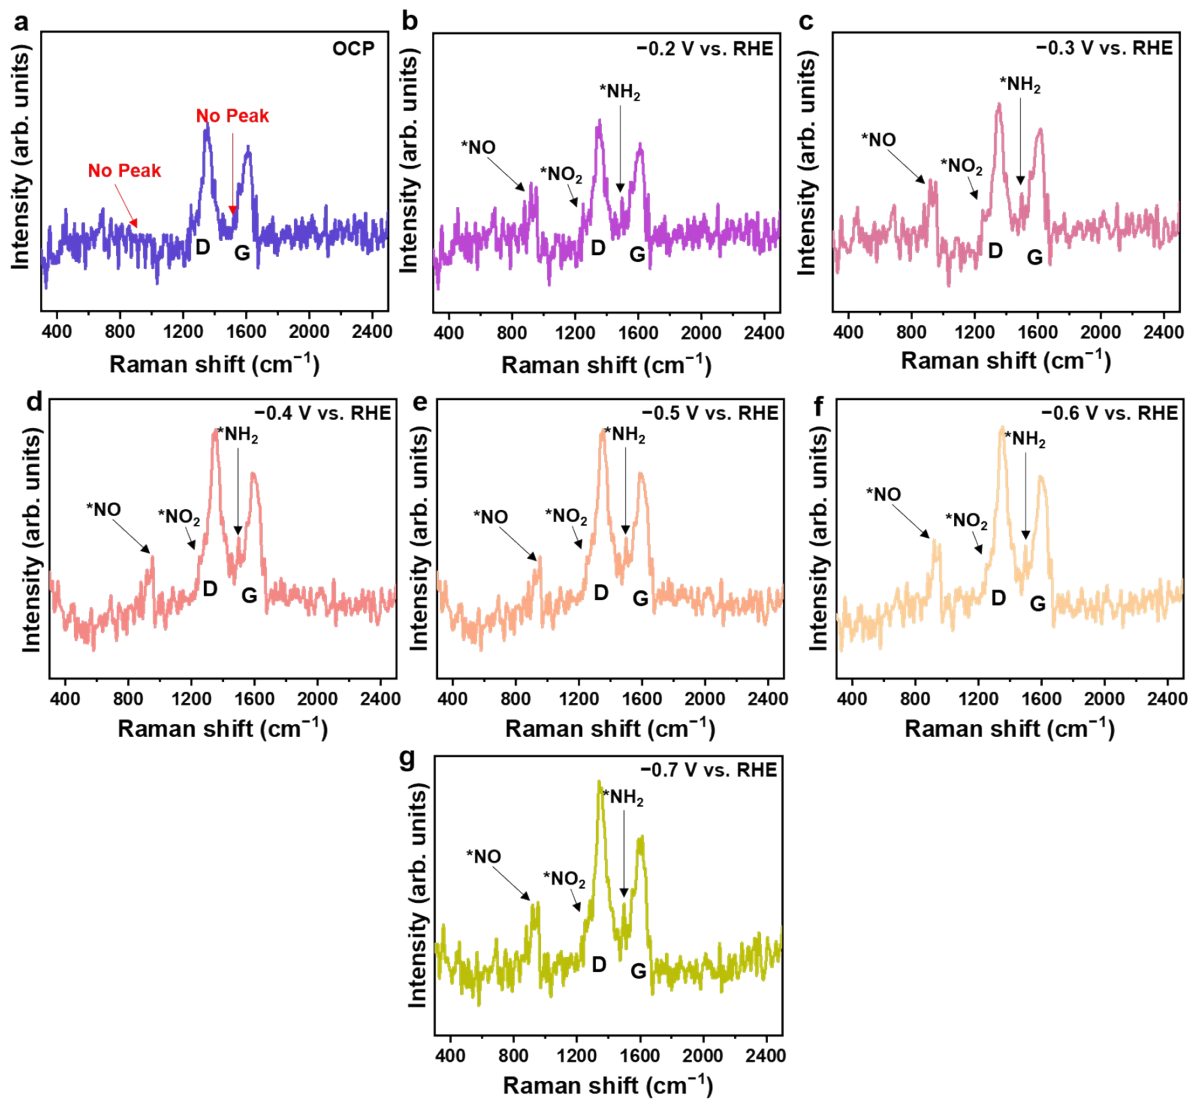

**Fig. S27.** In situ Raman spectra for CuCoPBA-S at different reduction potentials: (a) at OCP, (b)  $-0.2$  V vs. RHE, (c)  $-0.3$  V vs. RHE, (d)  $-0.4$  V vs. RHE, (e)  $-0.5$  V vs. RHE, (f)  $-0.6$  V vs. RHE, and (g)  $-0.7$  V vs. RHE.

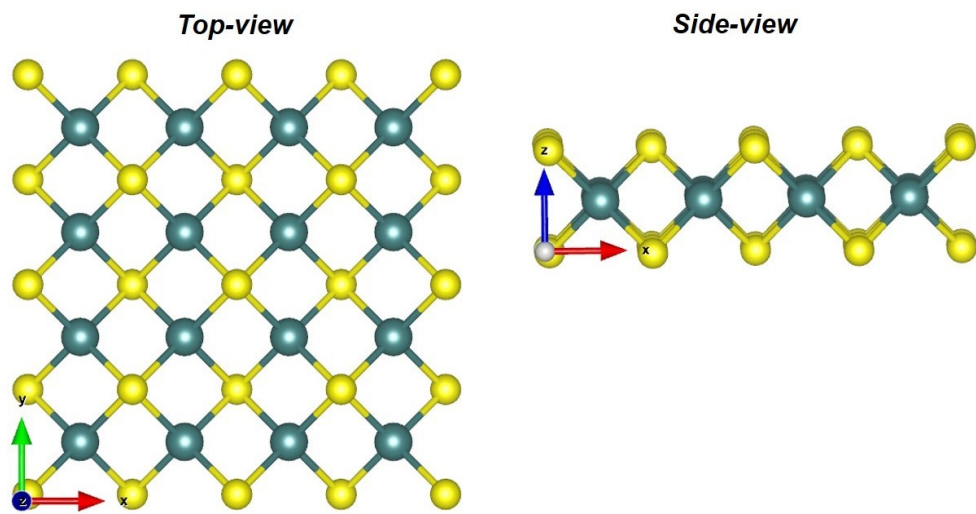

**Fig. S28.** DFT-optimized geometry for Cu<sub>2</sub>S.

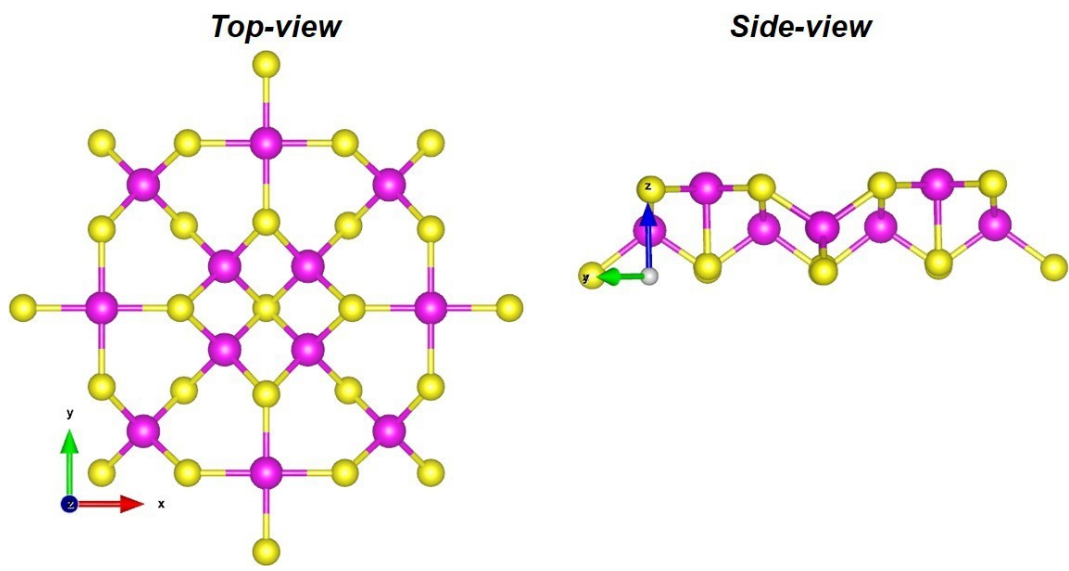

**Fig. S29.** DFT-optimized geometry for  $\text{Co}_9\text{S}_8$ .

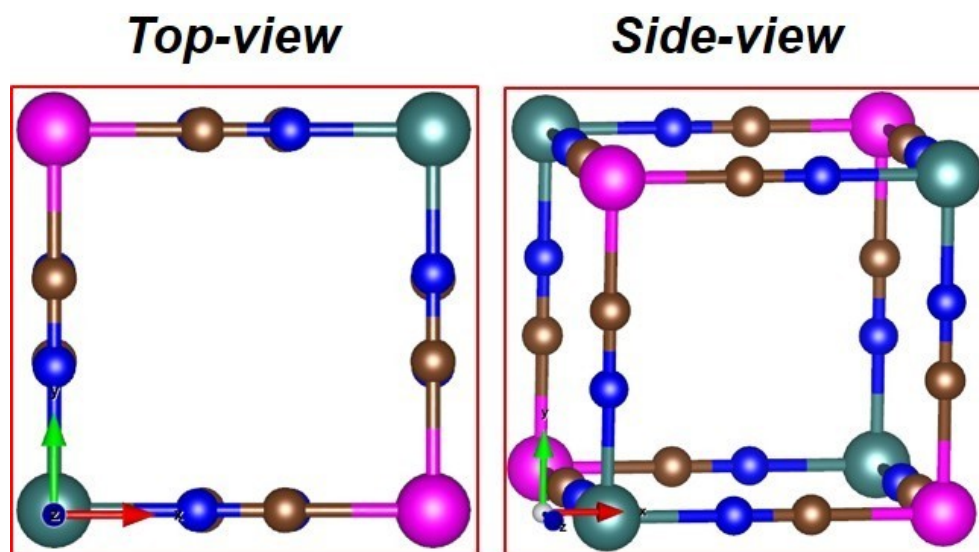

**Fig. S30.** DFT-optimized geometry for CoCuPBA.

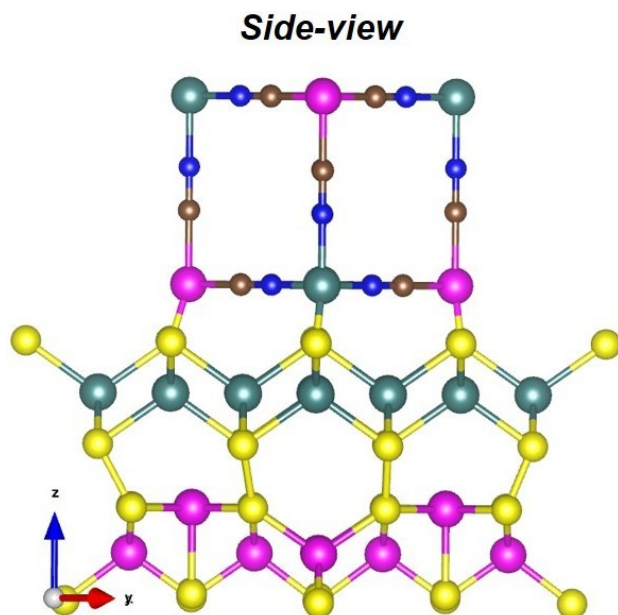

**Fig. S31.** DFT-optimized geometry for CoCuPBA-S.

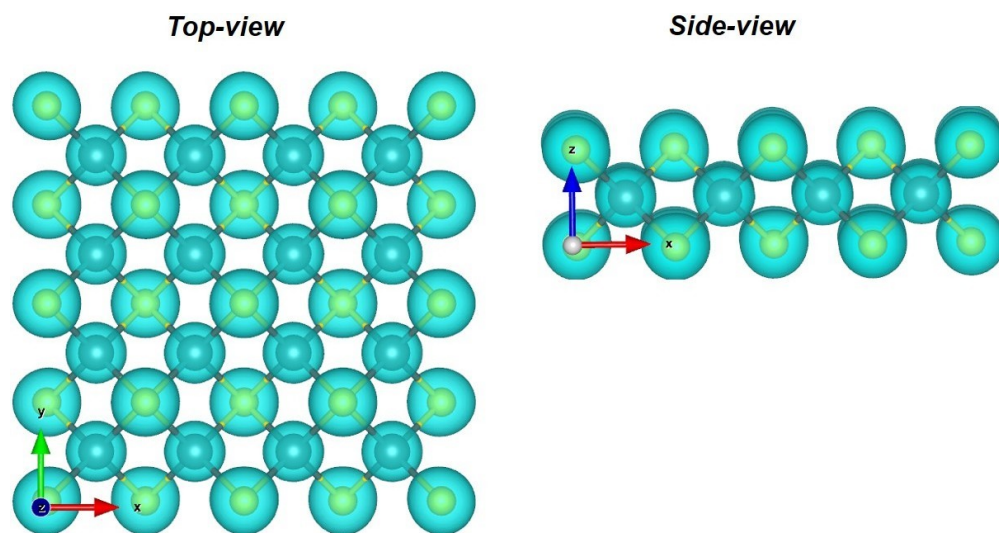

**Fig. S32.** DFT-optimized charge distribution in  $\text{Cu}_2\text{S}$ .

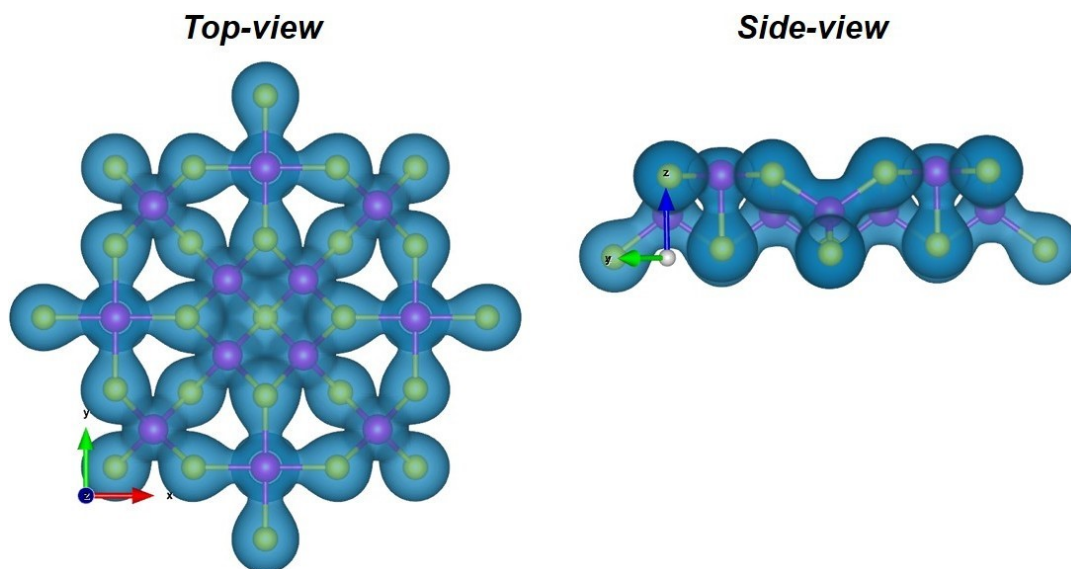

**Fig. S33.** DFT-optimized charge distribution in  $\text{Co}_9\text{S}_8$ .

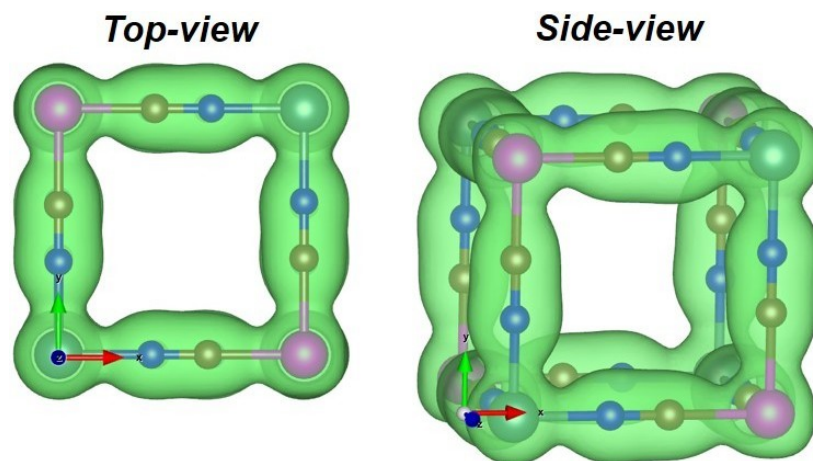

**Fig. S34.** DFT-optimized charge distribution in CuCoPBA.

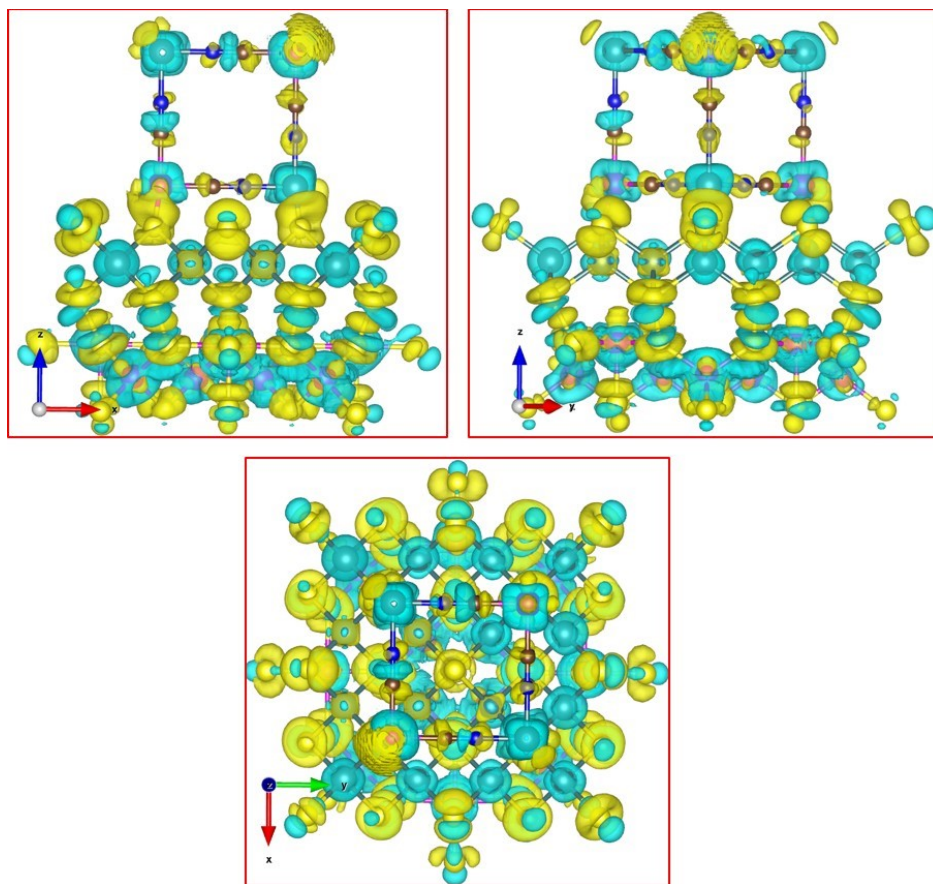

**Fig. S35.** DFT-optimized charge density difference covers the CuCoPBA surface.

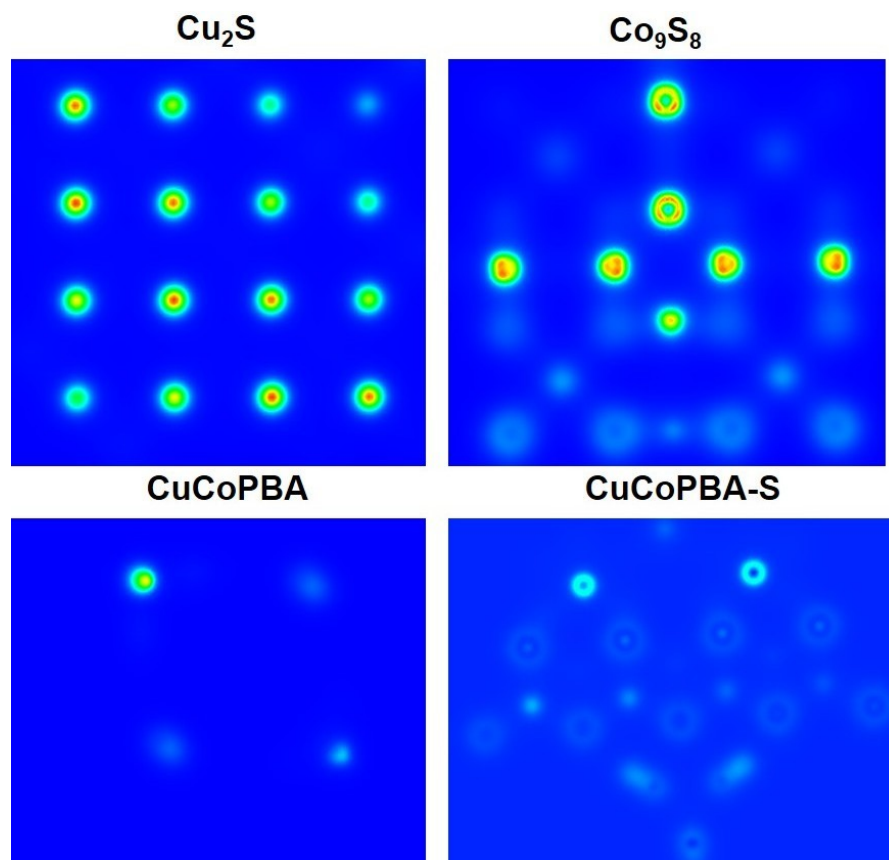

**Fig. S36.** DFT-optimized electron valence function (ELF) profile in  $\text{Cu}_2\text{S}$ ,  $\text{Co}_9\text{S}_8$ ,  $\text{CuCoPBA}$ , and  $\text{CuCoPBA-S}$ .

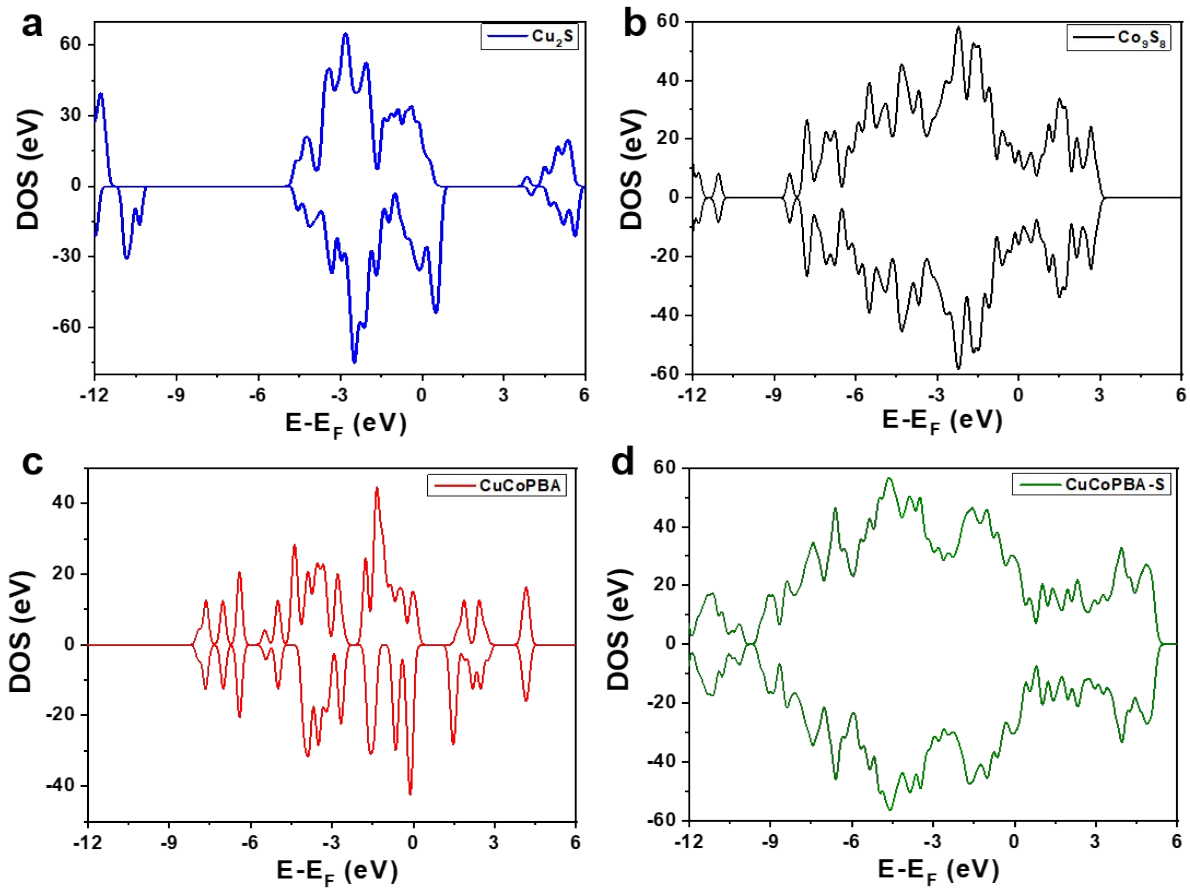

**Fig. S37.** DFT-calculated density of states of (a)  $\text{Cu}_2\text{S}$ , (b)  $\text{Co}_9\text{S}_8$ , (c)  $\text{CuCoPBA}$ , and (d)  $\text{CuCoPBA-S}$ .

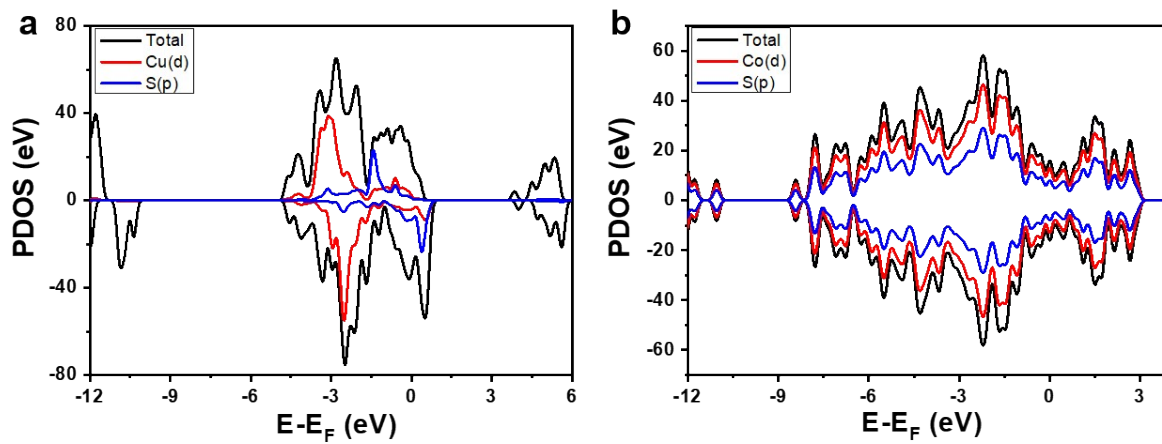

**Fig. S38.** DFT-calculated partial density of states (PDOS) for (a) Cu<sub>2</sub>S and (b) Co<sub>9</sub>S<sub>8</sub>.

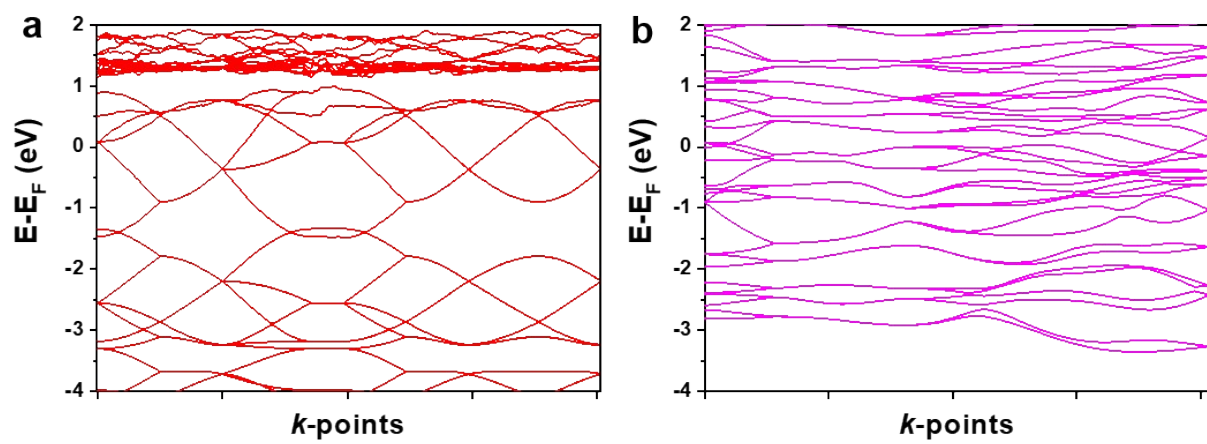

**Fig. S39.** DFT-computed band structure for (a)  $\text{Cu}_2\text{S}$  and (b)  $\text{Co}_9\text{S}_8$ .

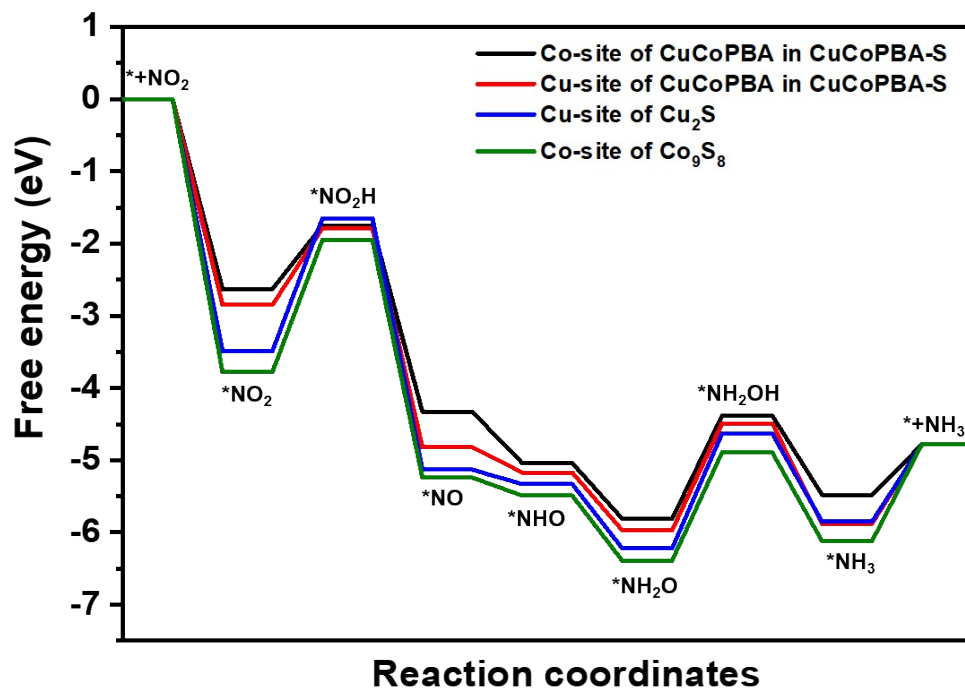

**Fig. S40.** The eNO<sub>2</sub>RR free energy diagram over the Cu-site of CuCoPBA in CoCuPBA-S, Cu<sub>2</sub>S and Co-site of CuCoPBA in CoCuPBA-S, Co<sub>9</sub>S<sub>8</sub>.

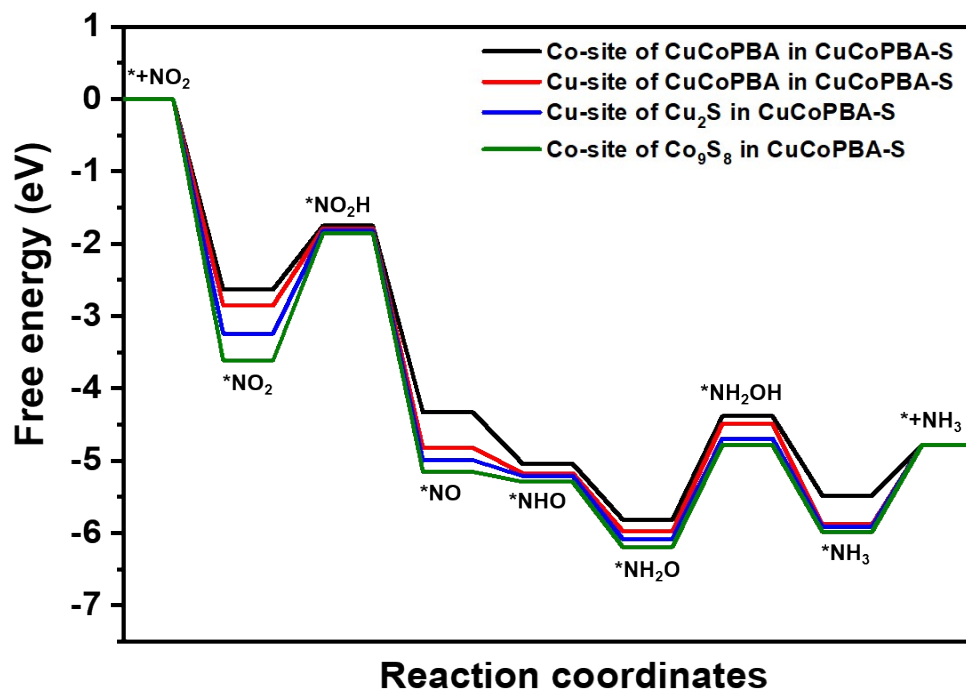

**Fig. S41.** The eNO<sub>2</sub>RR free energy diagram over the Cu-site of CuCoPBA in CoCuPBA/Cu<sub>2</sub>S/Co<sub>9</sub>S<sub>8</sub>, Cu<sub>2</sub>S in CoCuPBA/Cu<sub>2</sub>S/Co<sub>9</sub>S<sub>8</sub>, and Co-site of CuCoPBA in CoCuPBA/Cu<sub>2</sub>S/Co<sub>9</sub>S<sub>8</sub>, Co-site of Co<sub>9</sub>S<sub>8</sub> in CoCuPBA/Cu<sub>2</sub>S/Co<sub>9</sub>S<sub>8</sub>.

**Table S1.** Parameters used in the XRD Rietveld measurement and the detailed phase analysis results.

| <b>R-Values</b>          |                                                          |
|--------------------------|----------------------------------------------------------|
| R <sub>exp</sub> : 5.48  | R <sub>wp</sub> : 6.55 R <sub>p</sub> : 5.15 GOF : 1.20  |
| R <sub>exp</sub> : 25.42 | R <sub>wp</sub> : 30.41 R <sub>p</sub> : 37.58 DW : 1.46 |

| <b>Quantitative Analysis - Rietveld</b> |                                                     |           |
|-----------------------------------------|-----------------------------------------------------|-----------|
| Phase 1                                 | CuSCN                                               | 7.5(18) % |
| Phase 2                                 | Cobaltpentlandite                                   | 2.8(13) % |
| Phase 3                                 | Cu <sub>2</sub> S                                   | 48(5) %   |
| Phase 4                                 | S                                                   | 10(2) %   |
| Phase 5                                 | Cu <sub>3</sub> [Co(CN) <sub>6</sub> ] <sub>2</sub> | 32(4) %   |

| <b>Background</b>                   |     |         |
|-------------------------------------|-----|---------|
| One on X                            |     | 1(1600) |
| Chebychev polynomial, Coefficient 0 |     | 260(60) |
|                                     | 1   | -20(50) |
|                                     | 2   | -70(30) |
|                                     | 3   | 11(12)  |
|                                     | 4   | 1(6)    |
|                                     | 5   | 4(3)    |
|                                     | 6   | 9.1(13) |
| <b>Instrument</b>                   |     |         |
| Primary radius (mm)                 |     | 141.5   |
| Secondary radius (mm)               |     | 141.5   |
| Linear PSD 2Th angular range (°)    |     | 5       |
| FDS angle (°)                       |     | 1       |
| Full Axial Convolution              |     |         |
| Filament length (mm)                | 12  | 12      |
| Sample length (mm)                  | 15  | 15      |
| Receiving Slit length (mm)          | 12  | 12      |
| Primary Sollers (°)                 | 2.5 | 2.5     |
| Secondary Sollers (°)               | 2.5 | 2.5     |

| <b>Corrections</b>   |           |
|----------------------|-----------|
| Zero error           | 0.131 (7) |
| LP Factor            | 0         |
| <b>Miscellaneous</b> |           |
| X Calculation Step   | 0.02      |

| <b>Structure 1</b>                      |              |
|-----------------------------------------|--------------|
| Phase name                              | CuSCN        |
| R-Bragg                                 | 3.508        |
| Spacegroup                              | Pbca         |
| Scale                                   | 0.0000012(3) |
| Cell Mass                               | 973.027      |
| Cell Volume (Å <sup>3</sup> )           | 527.5(5)     |
| Wt% - Rietveld                          | 7.5(18)      |
| Double-Voigt Approach                   |              |
| Cry size Lorentzian                     | 600(1200)    |
| k: 1 LVol-IB (nm)                       | 400(800)     |
| k: 0.89 LVol-FWHM (nm)                  | 500(1100)    |
| Crystal Linear Absorption Coeff. (1/cm) | 161.83(17)   |
| Crystal Density (g/cm <sup>3</sup> )    | 3.063(3)     |
| Lattice Parameters                      |              |
| a (Å)                                   | 10.983(7)    |
| b (Å)                                   | 7.195(5)     |
| c (Å)                                   | 6.676(4)     |

| Site | Np | x       | y       | z       | Atom | Occ | Beg |
|------|----|---------|---------|---------|------|-----|-----|
| Cu1  | 8  | 0.18428 | 0.15640 | 0.13598 | Cu   | 1   | 0   |
| S1   | 8  | 0.78357 | 0.38390 | 0.17407 | S    | 1   | 0   |
| C1   | 8  | 0.92453 | 0.29429 | 0.13920 | C    | 1   | 0   |
| N1   | 8  | 0.01656 | 0.23210 | 0.11760 | N    | 1   | 0   |

| <b>Structure 2</b>                      |                   |
|-----------------------------------------|-------------------|
| Phase name                              | Cobaltpentlandite |
| R-Bragg                                 | 1.838             |
| Spacegroup                              | Fm-3m             |
| Scale                                   | 0.00000008(3)     |
| Cell Mass                               | 3147.675          |
| Cell Volume (Å <sup>3</sup> )           | 985(2)            |
| Wt% - Rietveld                          | 2.8(13)           |
| Double-Voigt Approach                   |                   |
| Cry size Lorentzian                     | 120(170)          |
| k: 1 LVol-IB (nm)                       | 80(110)           |
| k: 0.89 LVol-FWHM (nm)                  | 110(150)          |
| Crystal Linear Absorption Coeff. (1/cm) | 1307(3)           |
| Crystal Density (g/cm <sup>3</sup> )    | 5.306(11)         |
| Lattice Parameters                      |                   |
| a (Å)                                   | 9.950(7)          |

| Site | Np | x       | y       | z       | Atom | Occ | Beg |
|------|----|---------|---------|---------|------|-----|-----|
| Co1  | 4  | 0.50000 | 0.50000 | 0.50000 | Co   | 1   | 1   |
| Co2  | 32 | 0.12500 | 0.12500 | 0.12500 | Co   | 1   | 1   |
| S1   | 8  | 0.25000 | 0.25000 | 0.25000 | S    | 1   | 1   |
| S2   | 24 | 0.25000 | 0.00000 | 0.00000 | S    | 1   | 1   |

| <b>Structure 3</b>                      |                   |
|-----------------------------------------|-------------------|
| Phase name                              | Cu <sub>2</sub> S |
| R-Bragg                                 | 0.589             |
| Spacegroup                              | Fm-3m             |
| Scale                                   | 0.000037(7)       |
| Cell Mass                               | 637.136           |
| Cell Volume (Å <sup>3</sup> )           | 173.1(5)          |
| Wt% - Rietveld                          | 48(5)             |
| Double-Voigt Approach                   |                   |
| Cry size Lorentzian                     | 18(7)             |
| k: 1 LVol-IB (nm)                       | 12(4)             |
| k: 0.89 LVol-FWHM (nm)                  | 16(6)             |
| Crystal Linear Absorption Coeff. (1/cm) | 366.8(11)         |
| Crystal Density (g/cm <sup>3</sup> )    | 6.112(18)         |
| Lattice Parameters                      |                   |
| a (Å)                                   | 5.573(6)          |

| Site | Np  | x       | y       | z       | Atom | Occ    | Beg |
|------|-----|---------|---------|---------|------|--------|-----|
| Cu2  | 4   | 0.50000 | 0.50000 | 0.50000 | Cu   | 0.095  | 0   |
| Cu3  | 192 | 0.10670 | 0.16600 | 0.28260 | Cu   | 0.029  | 0   |
| S1   | 4   | 0.00000 | 0.00000 | 0.00000 | S    | 1      | 0   |
| Cu1  | 8   | 0.25000 | 0.25000 | 0.25000 | Cu   | 0.2575 | 0   |

| <b>Structure 4</b>                      |                 |
|-----------------------------------------|-----------------|
| Phase name                              | S               |
| R-Bragg                                 | 2.644           |
| Spacegroup                              | Fddd:2          |
| Scale                                   | 0.000000060(15) |
| Cell Mass                               | 4104.320        |
| Cell Volume (Å <sup>3</sup> )           | 3240(4)         |
| Wt% - Rietveld                          | 10(2)           |
| Double-Voigt Approach                   |                 |
| Cry size Lorentzian                     | 600(1300)       |
| k: 1 LVol-IB (nm)                       | 400(800)        |
| k: 0.89 LVol-FWHM (nm)                  | 500(1200)       |
| Crystal Linear Absorption Coeff. (1/cm) | 195.8(3)        |
| Crystal Density (g/cm <sup>3</sup> )    | 2.104(3)        |

| Lattice Parameters |            |
|--------------------|------------|
| a (Å)              | 10.417(7)  |
| b (Å)              | 12.809(10) |
| c (Å)              | 24.28(2)   |

| Site | Np | x        | y        | z       | Atom | Occ | Beg |
|------|----|----------|----------|---------|------|-----|-----|
| S1   | 32 | 0.03531  | 0.09156  | 0.37963 | S    | 1   | 0   |
| S2   | 32 | 0.03421  | -0.03206 | 0.32599 | S    | 1   | 0   |
| S3   | 32 | 0.10583  | 0.04636  | 0.20070 | S    | 1   | 0   |
| S4   | 32 | -0.04388 | 0.01895  | 0.25366 | S    | 1   | 0   |

| Structure 5                             |                                         |
|-----------------------------------------|-----------------------------------------|
| Phase name                              | $\text{Cu}_3[\text{Co}(\text{CN})_6]_2$ |
| R-Bragg                                 | 1.482                                   |
| Spacegroup                              | F-43m                                   |
| Scale                                   | 0.0000051(6)                            |
| Cell Mass                               | 620.713                                 |
| Cell Volume (Å <sup>3</sup> )           | 840(3)                                  |
| Wt% - Rietveld                          | 32(4)                                   |
| Double-Voigt Approach                   |                                         |
| Cry size Lorentzian                     | 22(4)                                   |
| k: 1 LVol-IB (nm)                       | 14(3)                                   |
| k: 0.89 LVol-FWHM (nm)                  | 20(4)                                   |
| Crystal Linear Absorption Coeff. (1/cm) | 97.9(3)                                 |
| Crystal Density (g/cm <sup>3</sup> )    | 1.227(4)                                |
| Lattice Parameters                      |                                         |
| a (Å)                                   | 9.436(10)                               |

| Site | Np | x       | y       | z       | Atom | Occ  | Beg |
|------|----|---------|---------|---------|------|------|-----|
| Cu1  | 4  | 0.50000 | 0.00000 | 0.00000 | Cu   | 0.75 | 0   |
| N1   | 24 | 0.30300 | 0.00000 | 0.00000 | N    | 0.5  | 0   |
| C1   | 24 | 0.18900 | 0.00000 | 0.00000 | C    | 0.5  | 0   |
| Co1  | 4  | 0.00000 | 0.00000 | 0.00000 | Co   | 0.5  | 0   |

**Table S2.** Comparison of the eNO<sub>2</sub>RR performance of the CuCoPBA-S with different electrocatalysts reported in the literature.

| SI No. | Catalyst                           | Electrolyte                                                                  | NH <sub>3</sub> yield rate                        | Reduction Potential (V) vs. RHE | Ref.             |
|--------|------------------------------------|------------------------------------------------------------------------------|---------------------------------------------------|---------------------------------|------------------|
| 1      | Ag nanoarray                       | 0.1 M NaOH + 0.1 M NO <sub>2</sub> <sup>-</sup>                              | 5751 μg h <sup>-1</sup> cm <sup>-2</sup>          | -0.7                            | 1                |
| 2      | Pd/CuO                             | 0.1 M K <sub>2</sub> SO <sub>4</sub> + 0.01 M KNO <sub>2</sub>               | 906.4 μg h <sup>-1</sup> cm <sup>-2</sup>         | -0.84                           | 2                |
| 3      | Co@JDC                             | 0.1 M NaOH + 0.1 M NO <sub>2</sub> <sup>-</sup>                              | 2.8 ± 0.1 mol h <sup>-1</sup> g <sup>-1</sup>     | -1.0                            | 3                |
| 4      | Ni@JBC-800                         | 0.1 M NaOH + 0.1 M NO <sub>2</sub> <sup>-</sup>                              | 4117.3 μg h <sup>-1</sup> cm <sup>-2</sup>        | -0.5                            | 4                |
| 5      | Ni@MDC                             | 0.1 M NaOH + 0.1 M NO <sub>2</sub> <sup>-</sup>                              | 6300 μg h <sup>-1</sup> cm <sup>-2</sup>          | -0.8                            | 5                |
| 6      | Ni@TiO <sub>2</sub>                | 0.1 M NaOH + 0.1 M NO <sub>2</sub> <sup>-</sup>                              | 568.7 μmol h <sup>-1</sup> cm <sup>-2</sup>       | -0.5                            | 6                |
| 7      | Cu@TiO <sub>2</sub> /TP            | 0.1 M Na <sub>2</sub> SO <sub>4</sub> + 0.1 M NO <sub>2</sub> <sup>-</sup>   | 760.5 μmol h <sup>-1</sup> cm <sup>-2</sup>       | -0.8                            | 7                |
| 8      | Ni-NSA-V <sub>Ni</sub>             | 0.2 M Na <sub>2</sub> SO <sub>4</sub> + 200 ppm NO <sub>2</sub> <sup>-</sup> | 235.98 μmol h <sup>-1</sup> cm <sup>-2</sup>      | -0.54                           | 8                |
| 9      | Ni-TiO <sub>2</sub>                | 0.1 M NaOH + 0.1 M NO <sub>2</sub> <sup>-</sup>                              | 380.27 μmol h <sup>-1</sup> cm <sup>-2</sup>      | -0.5                            | 9                |
| 10     | V-TiO <sub>2</sub>                 | 0.1 M NaOH + 0.1 M NO <sub>2</sub> <sup>-</sup>                              | 540.8 μmol h <sup>-1</sup> cm <sup>-2</sup>       | -0.7                            | 10               |
| 11     | P-TiO <sub>2</sub>                 | 0.1 M Na <sub>2</sub> SO <sub>4</sub> + 0.1 M NO <sub>2</sub> <sup>-</sup>   | 560.8 μmol h <sup>-1</sup> cm <sup>-2</sup>       | -0.6                            | 11               |
| 12     | Cu <sub>3</sub> P                  | 0.1 M PBS + 0.1 M NaNO <sub>2</sub>                                          | 1626.6 ± 36.1 μg h <sup>-1</sup> cm <sup>-2</sup> | -0.5                            | 12               |
| 13     | CoB                                | 0.1 M Na <sub>2</sub> SO <sub>4</sub> + 400 ppm NO <sub>2</sub> <sup>-</sup> | 233.1 μmol h <sup>-1</sup> cm <sup>-2</sup>       | -0.7                            | 13               |
| 14     | CoP                                | 0.1 M PBS + 500 ppm NO <sub>2</sub> <sup>-</sup>                             | 2260.7 ± 51.5 μg h <sup>-1</sup> cm <sup>-2</sup> | -0.2                            | 14               |
| 15     | Ni <sub>2</sub> P                  | 0.1 M PBS + 200 ppm NO <sub>2</sub> <sup>-</sup>                             | 2692.2 μg h <sup>-1</sup> cm <sup>-2</sup>        | -0.3                            | 15               |
| 16     | NiS <sub>2</sub> @TiO <sub>2</sub> | 0.1 M NaOH + 0.1 M NO <sub>2</sub> <sup>-</sup>                              | 591.9 μmol h <sup>-1</sup> cm <sup>-2</sup>       | -0.6                            | 16               |
| 17     | <b>CuCoPBA-S</b>                   | <b>1 M KOH + 0.1 M KNO<sub>2</sub></b>                                       | <b>3394.1 μg h<sup>-1</sup> cm<sup>-2</sup></b>   | <b>-0.5</b>                     | <b>This Work</b> |

## References

1. Q. Liu, G. Wen, D. Zhao, L. Xie, S. Sun, L. Zhang, Y. Luo, A. A. Alshehri, M. S. Hamdy and Q. Kong, Nitrite reduction over Ag nanoarray electrocatalyst for ammonia synthesis, *Journal of Colloid and Interface Science*, 2022, **623**, 513-519.
2. S. Liu, L. Cui, S. Yin, H. Ren, Z. Wang, Y. Xu, X. Li, L. Wang and H. Wang, Heterointerface-triggered electronic structure reformation: Pd/CuO nano-olives motivate nitrite electroreduction to ammonia, *Applied Catalysis B: Environmental*, 2022, **319**, 121876.
3. J. Wang, J. Liang, P. Liu, Z. Yan, L. Cui, L. Yue, L. Zhang, Y. Ren, T. Li and Y. Luo, Biomass Juncus derived carbon decorated with cobalt nanoparticles enables high-efficiency ammonia electrosynthesis by nitrite reduction, *Journal of Materials Chemistry A*, 2022, **10**, 2842-2848.
4. X. Li, Z. Li, L. Zhang, D. Zhao, J. Li, S. Sun, L. Xie, Q. Liu, A. A. Alshehri and Y. Luo, Ni nanoparticle-decorated biomass carbon for efficient electrocatalytic nitrite reduction to ammonia, *Nanoscale*, 2022, **14**, 13073-13077.
5. X. He, X. Li, X. Fan, J. Li, D. Zhao, L. Zhang, S. Sun, Y. Luo, D. Zheng and L. Xie, Ambient electroreduction of nitrite to ammonia over Ni nanoparticle supported on molasses-derived carbon sheets, *ACS Applied Nano Materials*, 2022, **5**, 14246-14250.
6. X. Ji, C. Ma, F. Zhang, X. He, X. Fan, J. Li, Z. Li, L. Ouyang, L. Zhang and T. Li, Ni@TiO<sub>2</sub> nanoarray with the Schottky junction for the highly selective electrochemical reduction of nitrite to ammonia, *ACS Sustainable Chemistry & Engineering*, 2023, **11**, 2686-2691.

7. L. Ouyang, X. Fan, Z. Li, X. He, S. Sun, Z. Cai, Y. Luo, D. Zheng, B. Ying and J. Zhang, High-efficiency electroreduction of nitrite to ammonia on a Cu@TiO<sub>2</sub> nanobelt array, *Chemical Communications*, 2023, **59**, 1625-1628.
8. C. Wang, W. Zhou, Z. Sun, Y. Wang, B. Zhang and Y. Yu, Integrated selective nitrite reduction to ammonia with tetrahydroisoquinoline semi-dehydrogenation over a vacancy-rich Ni bifunctional electrode, *Journal of Materials Chemistry A*, 2021, **9**, 239-243.
9. Z. Cai, C. Ma, D. Zhao, X. Fan, R. Li, L. Zhang, J. Li, X. He, Y. Luo and D. Zheng, Ni doping enabled improvement in electrocatalytic nitrite-to-ammonia conversion over TiO<sub>2</sub> nanoribbon, *Materials Today Energy*, 2023, **31**, 101220.
10. H. Wang, F. Zhang, M. Jin, D. Zhao, X. Fan, Z. Li, Y. Luo, D. Zheng, T. Li and Y. Wang, V-doped TiO<sub>2</sub> nanobelt array for high-efficiency electrocatalytic nitrite reduction to ammonia, *Materials Today Physics*, 2023, **30**, 100944.
11. L. Ouyang, X. He, S. Sun, Y. Luo, D. Zheng, J. Chen, Y. Li, Y. Lin, Q. Liu and A. M. Asiri, Enhanced electrocatalytic nitrite reduction to ammonia over P-doped TiO<sub>2</sub> nanobelt array, *Journal of Materials Chemistry A*, 2022, **10**, 23494-23498.
12. J. Liang, B. Deng, Q. Liu, G. Wen, Q. Liu, T. Li, Y. Luo, A. A. Alshehri, K. A. Alzahrani and D. Ma, High-efficiency electrochemical nitrite reduction to ammonium using a Cu<sub>3</sub>P nanowire array under ambient conditions, *Green Chemistry*, 2021, **23**, 5487-5493.
13. L. Hu, D. Zhao, C. Liu, Y. Liang, D. Zheng, S. Sun, Q. Li, Q. Liu, Y. Luo and Y. Liao, Amorphous CoB nanoarray as a high-efficiency electrocatalyst for nitrite reduction to ammonia, *Inorganic Chemistry Frontiers*, 2022, **9**, 6075-6079.

14. G. Wen, J. Liang, Q. Liu, T. Li, X. An, F. Zhang, A. A. Alshehri, K. A. Alzahrani, Y. Luo and Q. Kong, Ambient ammonia production via electrocatalytic nitrite reduction catalyzed by a CoP nanoarray, *Nano Research*, 2022, **15**, 972-977.
15. G. Wen, J. Liang, L. Zhang, T. Li, Q. Liu, X. An, X. Shi, Y. Liu, S. Gao and A. M. Asiri, Ni<sub>2</sub>P nanosheet array for high-efficiency electrohydrogenation of nitrite to ammonia at ambient conditions, *Journal of Colloid and Interface Science*, 2022, **606**, 1055-1063.
16. X. He, L. Hu, L. Xie, Z. Li, J. Chen, X. Li, J. Li, L. Zhang, X. Fang and D. Zheng, Ambient ammonia synthesis via nitrite electroreduction over NiS<sub>2</sub> nanoparticles-decorated TiO<sub>2</sub> nanoribbon array, *Journal of Colloid and Interface Science*, 2023, **634**, 86-92.
